# Supplementary material
Source: PubMed Central journal article supplement (PMC5973836)
Supplement: NIHMS967939-supplement-Supplemental.pdf [file NIHMS967939-supplement-Supplemental.pdf]

## Electronic Supplementary Information

**Computational, Electrochemical, and Spectroscopic Studies of two Mononuclear Cobaloximes: The influence of an axial pyridine and solvent on the redox behaviour and evidence for pyridine coordination to cobalt(I) and cobalt(II) metal centres.**

Mark A. W. Lawrence,<sup>a</sup> Michael J. Celestine,<sup>a</sup> Edward T. Artis,<sup>a</sup> Lorne S. Joseph,<sup>b</sup> Deisy L. Esquivel,<sup>c</sup> Abram J. Ledbetter,<sup>d</sup> Donald M. Crokek,<sup>e</sup> William L. Jarrett,<sup>f</sup> Craig A. Bayse,<sup>a</sup> Matthew I. Brewer,<sup>a</sup> and Alvin A. Holder\*<sup>a</sup>

### Table of Contents

|                                                                                        |    |
|----------------------------------------------------------------------------------------|----|
| <b>Electronic Supplementary Information</b> .....                                      | 1  |
| 1 Results .....                                                                        | 2  |
| 1.1 Characterization .....                                                             | 2  |
| 1.2 Mole ratio plots and equilibria data .....                                         | 5  |
| 1.3 Electrochemical data .....                                                         | 16 |
| 1.4 Spectroelectrochemical data .....                                                  | 22 |
| 1.5 <sup>11</sup> B, <sup>19</sup> F, and <sup>59</sup> Co NMR spectroscopic data..... | 31 |
| 1.6 Electrocatalytic behaviour.....                                                    | 34 |

# 1 Results

## 1.1 Characterization

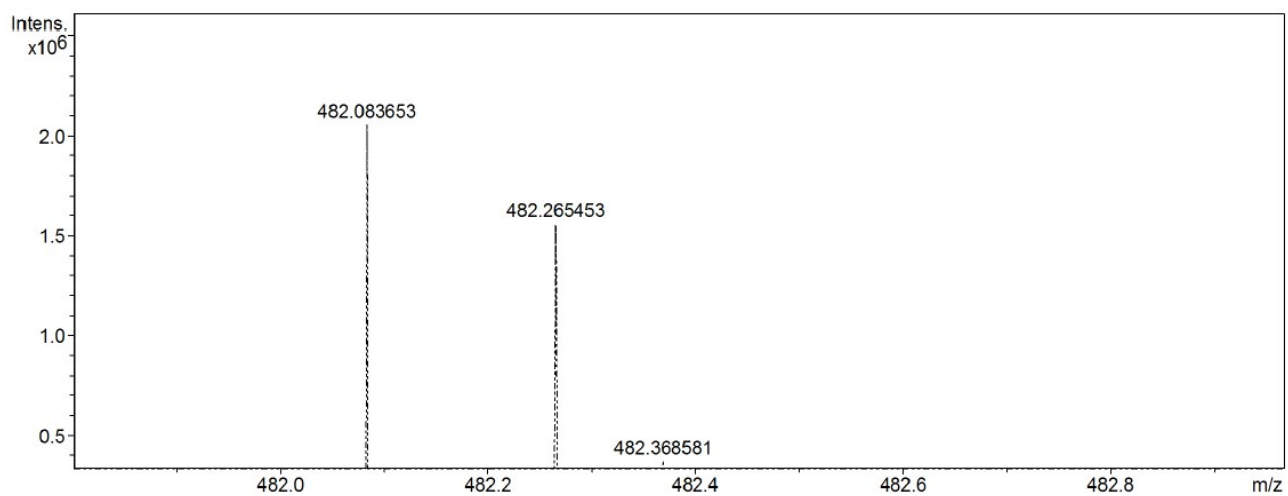

**Figure S1.** High resolution ESI mass spectrum of  $[\text{Co}(\text{dmgbF}_2)_2(\text{H}_2\text{O})(\text{py})]^+$  in the positive mode with  $\text{CH}_3\text{CN}$  as solvent.

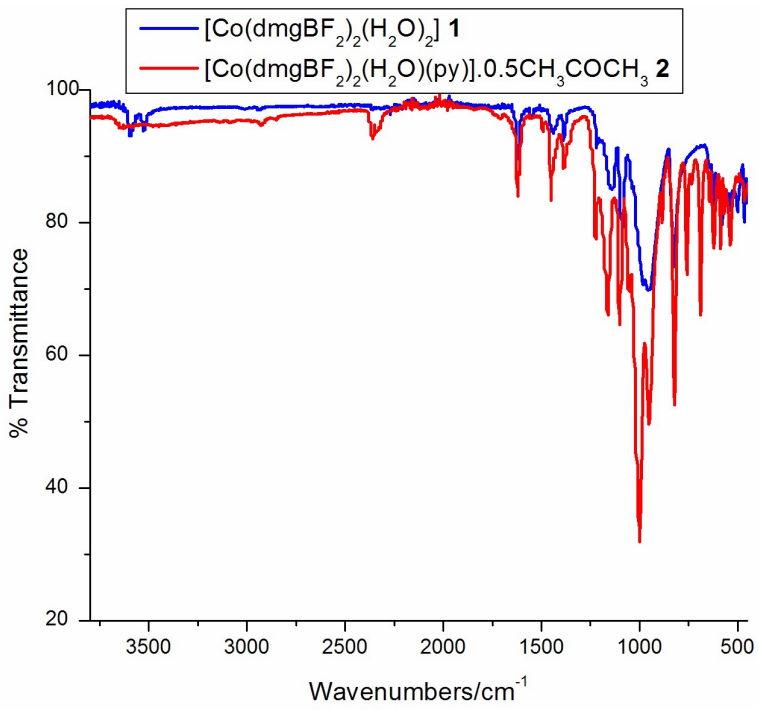

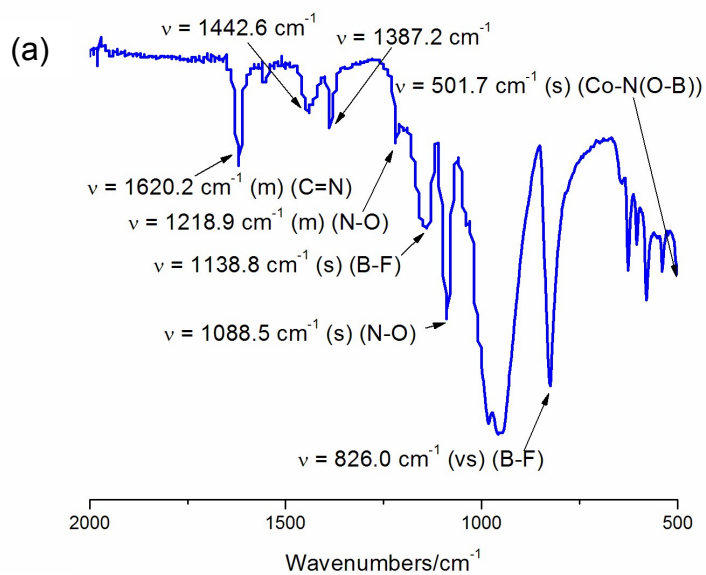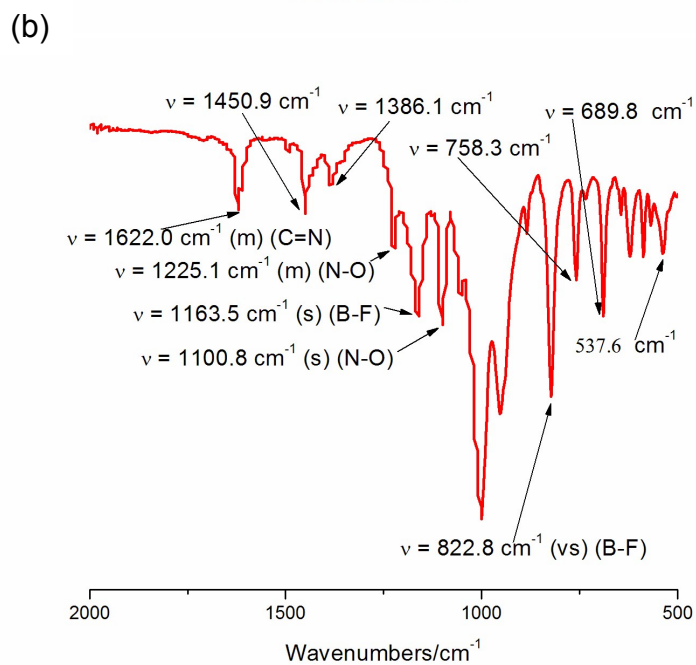

**Figure S2.** Full FT IR spectra and assignment of selected stretching frequencies of (a) complex **1** and (b) complex **2**.



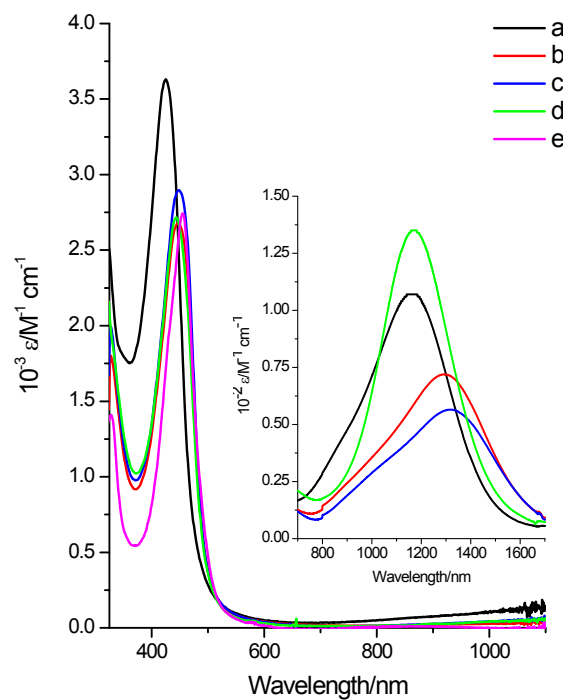

**Figure S3.** A plot of the molar extinction coefficient versus wavelength of complex **1**. Solvent = acetonitrile (a), acetone (b), 2-butanone (c), 1,2-difluorobenzene/acetone (4:1, v/v) (d), and water (e). NIR spectrum is shown as an inset.

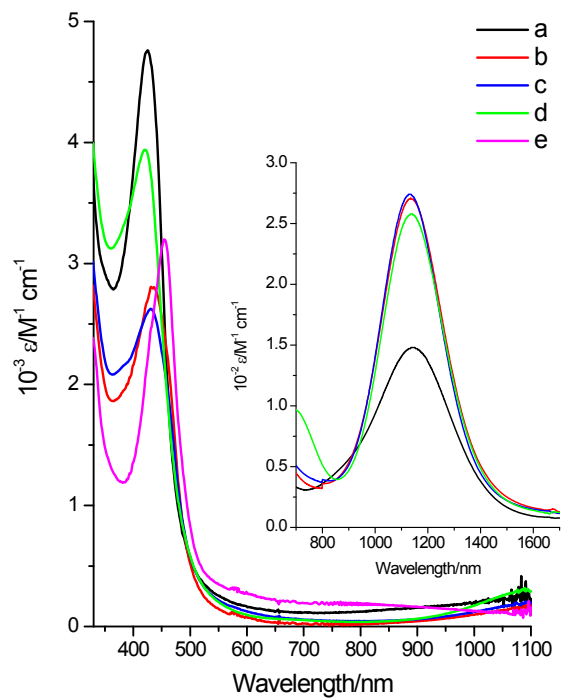

**Figure S4.** A plot of the molar extinction coefficient versus wavelength of complex **2**. Solvent = acetonitrile (a), acetone (b), 2-butanone (c), 1,2-difluorobenzene/acetone (4:1, v/v) (d), and water (e). NIR spectrum is shown as an inset.

## 1.2 Mole ratio plots and equilibria studies

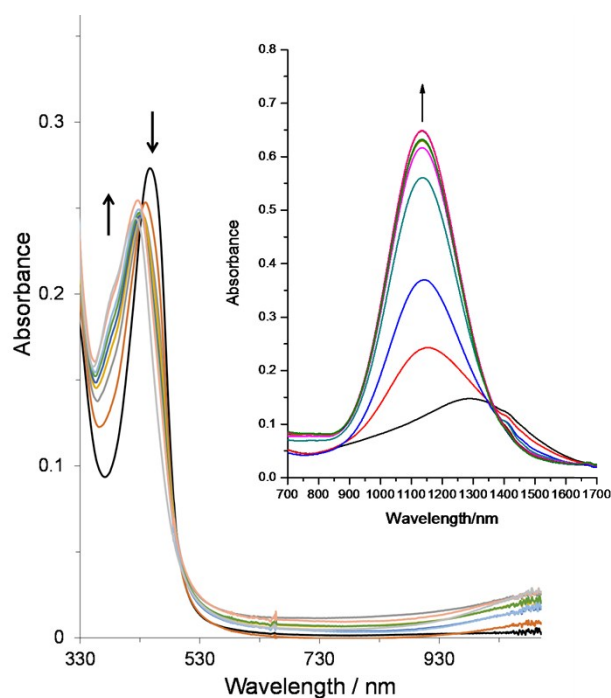

**Figure S5.** The effect of pyridine addition to complex **1** in the UV-visible spectrum (NIR spectrum is shown as an inset) in acetone. [complex **1**] = 0.1 mM (2.0 mM for NIR spectral studies) and  $0.0 \text{ mM} \leq [\text{pyridine}] \leq 4.0 \text{ mM}$  ( $0.0 \text{ mM} \leq [\text{pyridine}] \leq 4.0 \text{ mM}$  for NIR spectral studies), and path length = 1.0 cm.

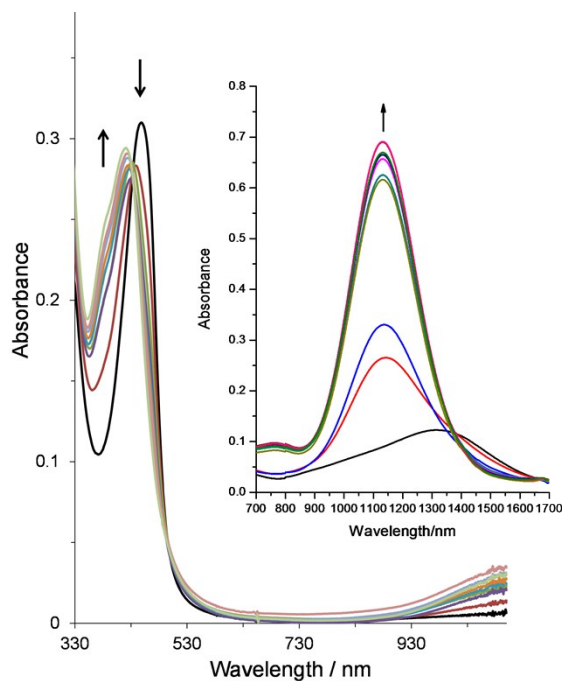

**Figure S6.** The effect of pyridine addition to complex **1** in the UV-visible spectrum (NIR spectrum is shown as an inset) in 2-butanone. [complex **1**] = 0.1 mM (2.0 mM for NIR spectral studies) and  $0.0 \text{ mM} \leq [\text{pyridine}] \leq 4.0 \text{ mM}$  ( $0.0 \text{ mM} \leq [\text{pyridine}] \leq 4.0 \text{ mM}$  for NIR spectral studies), and path length = 1.0 cm.

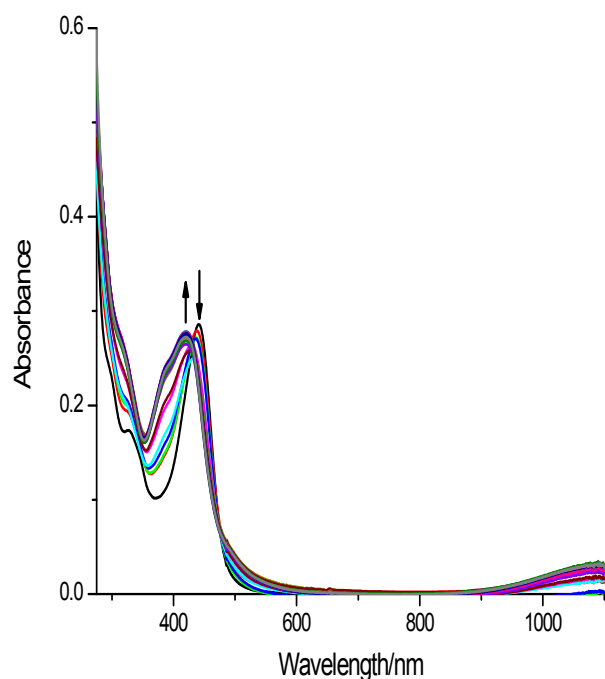

**Figure S7.** A plot of absorbance versus wavelength for a titration of complex **1** with pyridine in dichloromethane at 20 °C. [Complex **1**] = 0.10 mM and path length = 1.0 cm.

**Table S1.** NIR spectral data for absorbance at 1162 nm,  $\log [(A_0 - A)/(A - A_\infty)]$ , and  $\log [\text{pyridine}]$  for complex **1** in acetonitrile at 20 °C. [complex **1**] = 2.0 mM and path length = 1.0 cm.

| [py]/[complex <b>1</b> ] | Abs <sub>1162 nm</sub> | $\log [\text{pyridine}]$ | $\log [(A_0 - A)/(A - A_\infty)]$ |
|--------------------------|------------------------|--------------------------|-----------------------------------|
| 0                        | 0.2474                 | --                       | ---                               |
| 0.25                     | 0.2892                 | -3.572                   | -0.8823                           |
| 0.33                     | 0.3059                 | -3.474                   | -0.7130                           |
| 0.40                     | 0.3222                 | -3.414                   | -0.5821                           |
| 0.50                     | 0.3344                 | -3.286                   | -0.4977                           |
| 0.65                     | 0.36315                | -3.182                   | -0.3254                           |
| 0.75                     | 0.3720                 | -3.092                   | -0.2774                           |
| 0.87                     | 0.3895                 | -3.021                   | -0.1870                           |
| 1.0                      | 0.4062                 | -2.951                   | -0.1040                           |
| 1.12                     | 0.4255                 | -2.902                   | -0.0107                           |
| 1.50                     | 0.4645                 | -2.746                   | 0.1800                            |
| 1.75                     | 0.4845                 | -2.661                   | 0.2831                            |
| 2.0                      | 0.4949                 | -2.580                   | 0.3401                            |
| 2.25                     | 0.5103                 | -2.517                   | 0.4301                            |
| 2.75                     | 0.5131                 | -2.395                   | 0.4473                            |
| 3.0                      | 0.5258                 | -2.351                   | 0.5295                            |
| 4.0                      | 0.5495                 | -2.199                   | 0.7126                            |
| 5.0                      | 0.5562                 | -2.082                   | 0.7756                            |

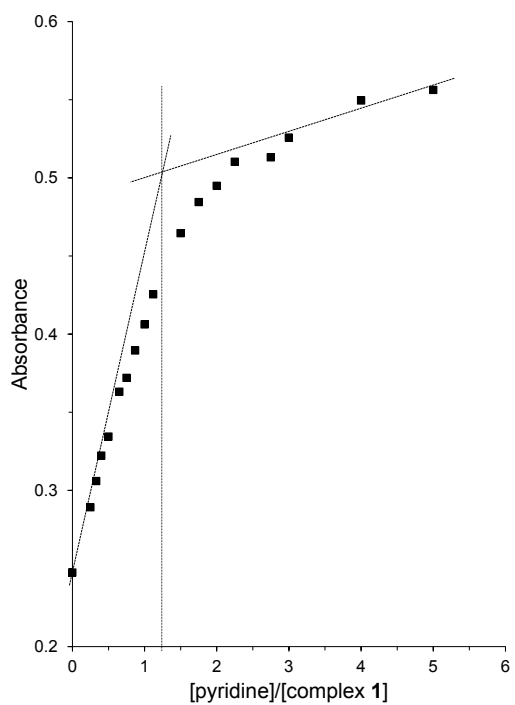

**Figure S8.** Mole ratio plot for the interaction of pyridine with complex **1** in acetonitrile. [complex **1**] = 2.0 mM,  $\lambda = 1162$  nm, temperature = 20 °C, and path length = 1.0 cm.

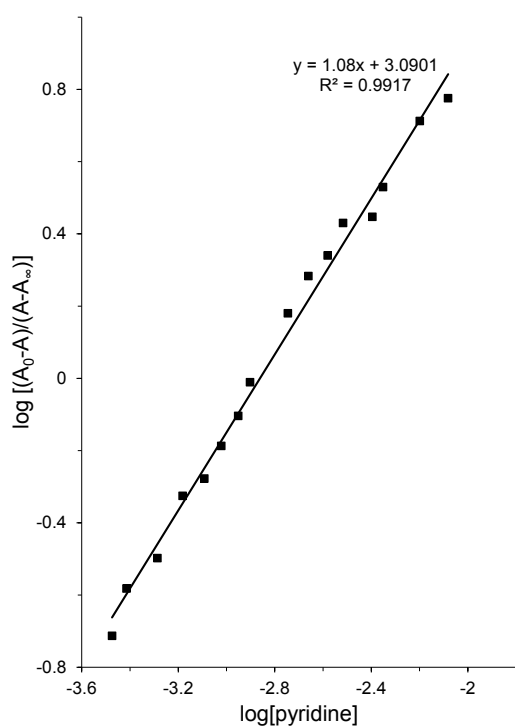

**Figure S9.** A plot of  $\log [(A_0-A)/(A-A_\infty)]$  versus  $\log [\text{pyridine}]$  for complex **1** at 1162 nm in acetonitrile at 20 °C.

**Table S2.** UV-visible spectral data for absorbance at 372 nm,  $\log [(A_0-A)/(A-A_\infty)]$ , and  $\log [\text{pyridine}]$  for complex **1** in acetone at 20 °C.  $[\text{complex } \mathbf{1}] = 0.10 \text{ mM}$  and path length = 1.0 cm.

| $[\text{py}]/[\text{complex } \mathbf{1}]$ | $\text{Abs}_{372 \text{ nm}}$ | $\log [(A_0-A)/(A-A_\infty)]$ | $\log [\text{pyridine}]$ |
|--------------------------------------------|-------------------------------|-------------------------------|--------------------------|
| 0                                          | 0.0922                        | ---                           | ---                      |
| 0.50                                       | 0.1265                        | -0.2309                       | -4.886                   |
| 0.87                                       | 0.1444                        | 0.1099                        | -4.513                   |
| 1.0                                        | 0.1497                        | 0.2128                        | -4.420                   |
| 1.25                                       | 0.1590                        | 0.4103                        | -4.276                   |
| 1.50                                       | 0.1618                        | 0.4763                        | -4.125                   |
| 1.75                                       | 0.1696                        | 0.7018                        | -4.038                   |
| 2.0                                        | 0.1724                        | 0.8020                        | -3.945                   |
| 4.0                                        | 0.1796                        | 1.206                         | -3.514                   |

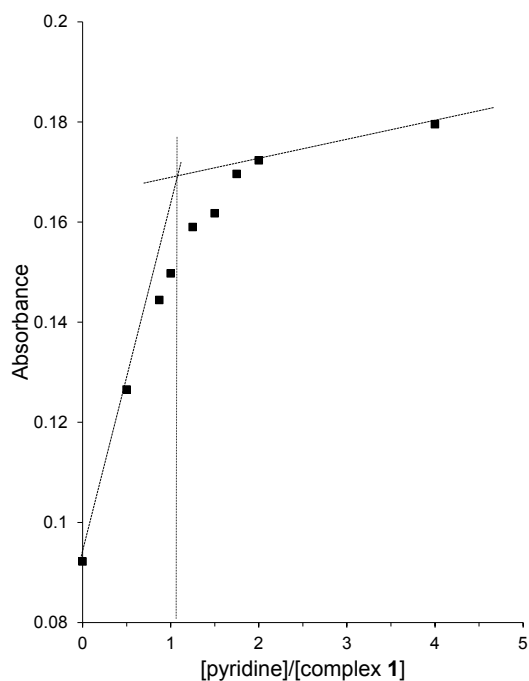

**Figure S10.** Mole ratio plot for the interaction of pyridine with complex **1** in acetone.  $[\text{complex } \mathbf{1}] = 0.10 \text{ mM}$ ,  $\lambda = 372 \text{ nm}$ , temperature = 20 °C, and path length = 1.0 cm.

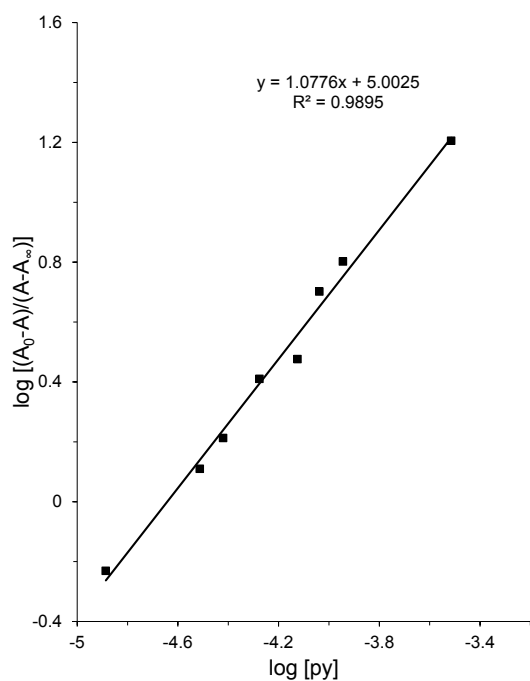

**Figure S11.** A plot of  $\log [(A_0-A)/(A-A_\infty)]$  versus  $\log [\text{pyridine}]$  for complex **1** at 371 nm in acetone at 20 °C.

**Table S3.** UV-visible spectral data for absorbance at 372 nm,  $\log [(A_0-A)/(A-A_\infty)]$ , and  $\log [\text{pyridine}]$  for complex **1** in 2-butanone at 20 °C.  $[\text{complex } \mathbf{1}] = 0.10 \text{ mM}$ , and path length = 1.0 cm.

| $[\text{py}]/[\text{complex } \mathbf{1}]$ | $\text{Abs}_{372 \text{ nm}}$ | $\log [(A_0-A)/(A-A_\infty)]$ | $\log [\text{pyridine}]$ |
|--------------------------------------------|-------------------------------|-------------------------------|--------------------------|
| 0                                          | 0.1045                        | ---                           | ---                      |
| 0.50                                       | 0.1498                        | -4.857                        | -0.2480                  |
| 1.0                                        | 0.1847                        | -4.442                        | 0.2479                   |
| 1.25                                       | 0.1973                        | -4.292                        | 0.4529                   |
| 1.50                                       | 0.2035                        | -4.148                        | 0.5716                   |
| 1.75                                       | 0.2105                        | -4.043                        | 0.7357                   |
| 2.0                                        | 0.2150                        | -3.951                        | 0.8664                   |
| 4.0                                        | 0.2244                        | -3.516                        | 1.330                    |

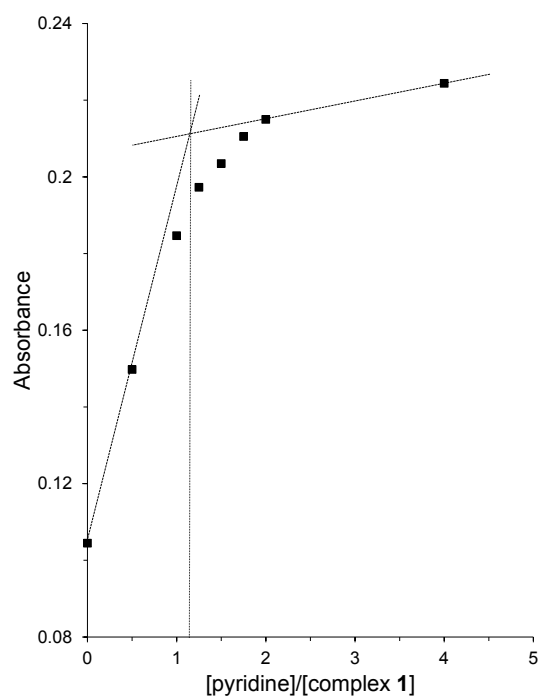

**Figure S12.** Mole ratio plot for the interaction of pyridine with complex **1** in 2-butanone. [complex **1**] = 0.10 mM,  $\lambda = 372$  nm, temperature = 20 °C, path length = 1.0 cm.

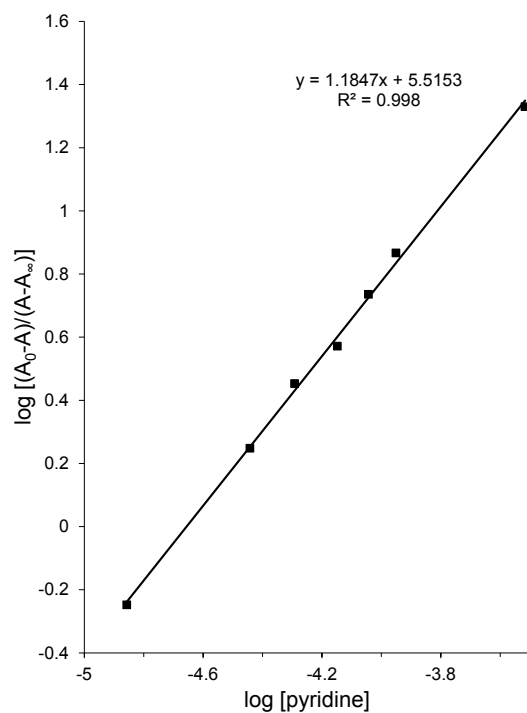

**Figure S13.** A plot of  $\log [(A_0 - A)/(A - A_\infty)]$  versus  $\log [\text{pyridine}]$  for complex **1** at 372 nm in 2-butanone at 20 °C.

**Table S4.** UV-visible spectral data for absorbance at 372 nm,  $\log [(A_0-A)/(A-A_\infty)]$ , and  $\log [\text{pyridine}]$  for complex **1** in 1,2-difluorobenzene/acetone (4:1, v/v) at 20 °C.  $[\text{complex } \mathbf{1}] = 0.10 \text{ mM}$ , and path length = 1.0 cm.

| $[\text{py}]/[\text{complex } \mathbf{1}]$ | $\text{Abs}_{372 \text{ nm}}$ | $\log [\text{pyridine}]$ | $\log [(A_0-A)/(A-A_\infty)]$ |
|--------------------------------------------|-------------------------------|--------------------------|-------------------------------|
| 0                                          | 0.1058                        | ---                      | ---                           |
| 0.33                                       | 0.1336                        | -5.349                   | -0.3990                       |
| 0.40                                       | 0.1390                        | -5.231                   | -0.2858                       |
| 0.50                                       | 0.1444                        | -4.988                   | -0.1810                       |
| 0.65                                       | 0.1556                        | -4.860                   | 0.02092                       |
| 0.75                                       | 0.1593                        | -4.700                   | 0.08827                       |
| 1.25                                       | 0.1817                        | -4.329                   | 0.5519                        |
| 1.50                                       | 0.1864                        | -4.173                   | 0.6848                        |
| 1.75                                       | 0.1874                        | -4.041                   | 0.7184                        |
| 2.5                                        | 0.1930                        | -3.795                   | 0.9394                        |
| 5.0                                        | 0.2011                        | -3.396                   | 1.7048                        |

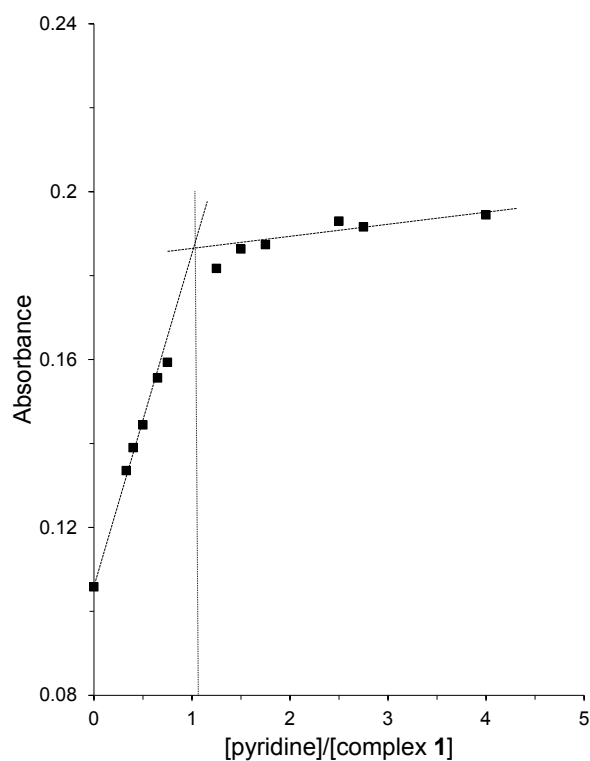

**Figure S14.** Mole ratio plot for the interaction of pyridine with complex **1** in 1,2-difluorobenzene/acetone (4:1, v/v).  $[\text{complex } \mathbf{1}] = 0.10 \text{ mM}$ ,  $\lambda = 372 \text{ nm}$ , temperature = 20 °C, path length = 1.0 cm.



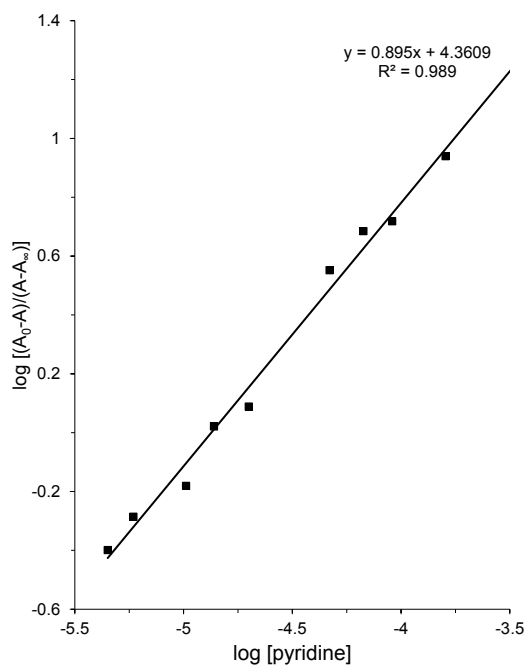

**Figure S15.** A plot of  $\log [(A_0-A)/(A-A_\infty)]$  versus  $\log [\text{pyridine}]$  for complex **1** at 372 nm in 1,2-difluorobenzene/acetone (4:1, v/v) at 20 °C.

**Table S5.** UV-visible spectral data for absorbance at 370 nm,  $\log [(A_0-A)/(A-A_\infty)]$  and  $\log [\text{pyridine}]$  for complex **1** in dichloromethane at 20 °C.  $[\text{complex } \mathbf{1}] = 0.10 \text{ mM}$ , and path length = 1.0 cm.

| $[\text{py}]/[\text{complex } \mathbf{1}]$ | $\text{Abs}_{370 \text{ nm}}$ | $\log [\text{pyridine}]$ | $\log [(A_0-A)/(A-A_\infty)]$ |
|--------------------------------------------|-------------------------------|--------------------------|-------------------------------|
| 0                                          | 0.1016                        | --                       | --                            |
| 0.33                                       | 0.1341                        | -6.166                   | -0.3210                       |
| 0.40                                       | 0.1409                        | -6.068                   | -0.1916                       |
| 0.50                                       | 0.1506                        | -5.909                   | -0.02143                      |
| 0.75                                       | 0.1738                        | -5.507                   | 0.4077                        |
| 0.87                                       | 0.1843                        | -5.330                   | 0.6680                        |
| 1.0                                        | 0.1914                        | -4.977                   | 0.9282                        |
| 1.12                                       | 0.1949                        | -4.720                   | 1.121                         |
| 1.25                                       | 0.1964                        | -4.514                   | 1.226                         |
| 1.5                                        | 0.1977                        | -4.265                   | 1.350                         |
| 2.0                                        | 0.2003                        | -3.993                   | 1.755                         |
| 2.25                                       | 0.1997                        | -3.895                   | 1.635                         |
| 2.5                                        | 0.1991                        | -3.816                   | 1.531                         |
| 3.0                                        | 0.2011                        | -3.697                   | 2.025                         |

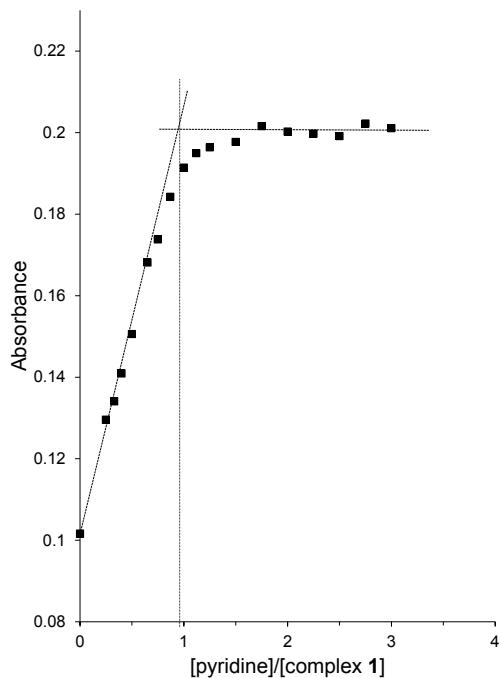

**Figure S16.** Mole ratio plot for the interaction of pyridine with complex **1** in dichloromethane. [complex **1**] = 0.10 mM,  $\lambda = 370$  nm, temperature = 20 °C, and path length = 1.0 cm.

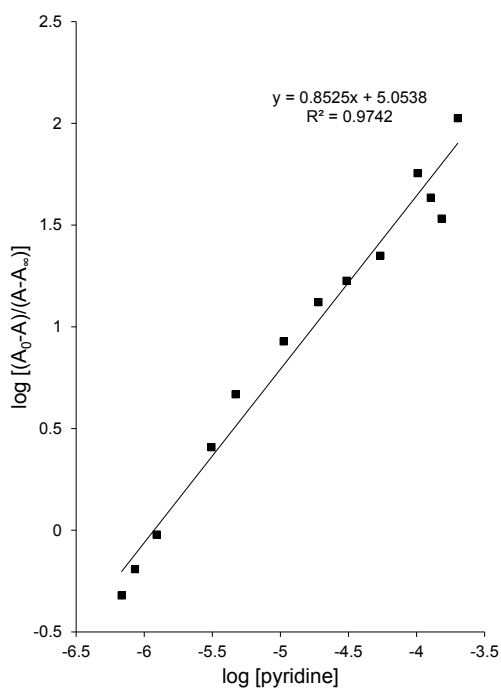

**Figure S17.** A plot of  $\log [(A_0 - A)/(A - A_\infty)]$  versus  $\log [\text{pyridine}]$  for complex **1** at 370 nm in dichloromethane at 20 °C.

**Table S6.** UV-visible spectral data for absorbance at 447 nm,  $\log [(A_0-A)/(A-A_\infty)]$ ,  $\log [\text{pyridine}]$  for the  $[\text{nBu}_4\text{N}]\text{BH}_4$  reduced form of complex **1** in acetonitrile.  $[\text{complex } \mathbf{1}] = 1.0 \text{ mM}$ , temperature = 20 °C, and path length = 1.0 mm.

| $[\text{py}]/[\text{complex } \mathbf{1}]$ | $\text{Abs}_{447 \text{ nm}}$ | $\log [(A_0-A)/(A-A_\infty)]$ | $\log [\text{py}]$ |
|--------------------------------------------|-------------------------------|-------------------------------|--------------------|
| 0                                          | 0.1781                        | ---                           | ---                |
| 0.5                                        | 0.2404                        | -0.3440                       | -3.725             |
| 1.0                                        | 0.2954                        | 0.1524                        | -3.384             |
| 1.5                                        | 0.3199                        | 0.3871                        | -3.102             |
| 2.0                                        | 0.3433                        | 0.6780                        | -2.931             |
| 2.5                                        | 0.3538                        | 0.8610                        | -2.790             |
| 4.0                                        | 0.3689                        | 1.322                         | -2.516             |

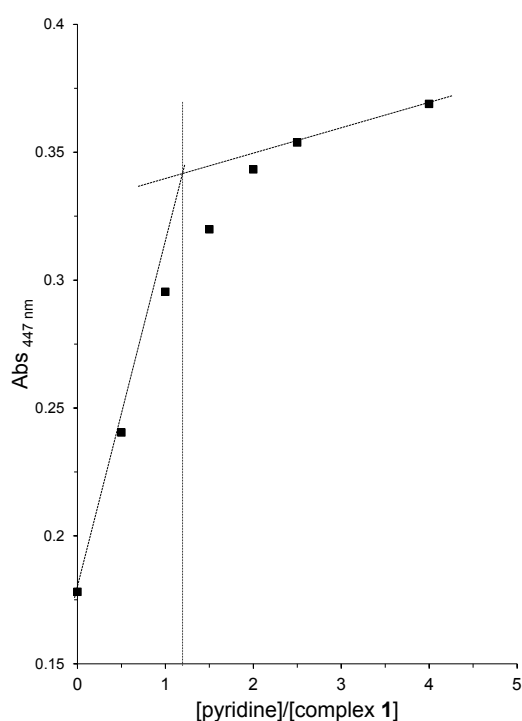

**Figure S18.** Mole ratio plot for the interaction of pyridine with the  $[\text{nBu}_4\text{N}]\text{BH}_4$  reduced form of complex **1** in acetonitrile.  $[\text{complex } \mathbf{1}] = 1.0 \text{ mM}$ , temperature = 20 °C, and path length = 1.0 mm.

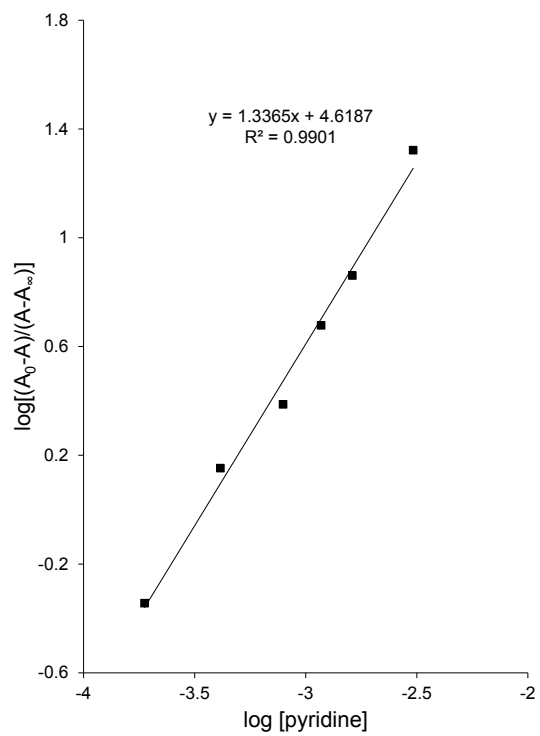

**Figure S19.** A plot of  $\log [(A_0-A)/(A-A_\infty)]$  versus  $\log [\text{py}]$  for the  $[\text{nBu}_4\text{N}]\text{BH}_4$  reduced form of complex **1** in acetonitrile at 20 °C.

### 1.3 Electrochemical data

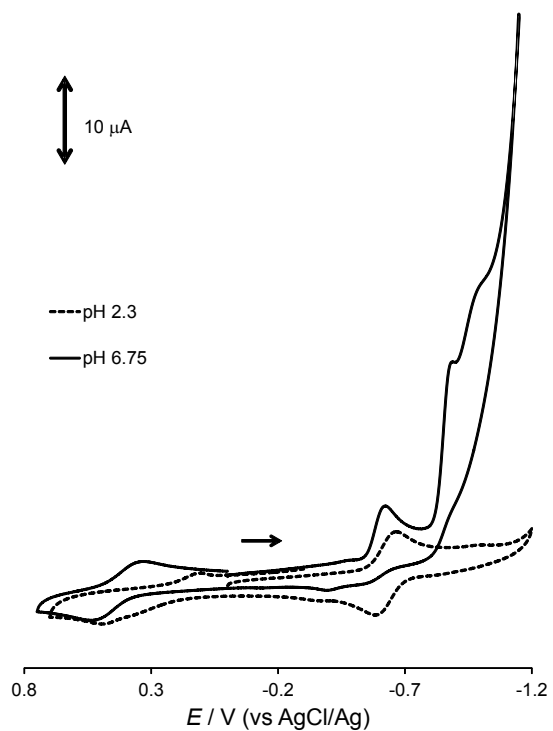

**Figure S20.** Cyclic voltammograms of complex **1** in water on a glassy carbon working electrode versus AgCl/Ag. [complex **1**] = 0.64 mM, pH = 2.30 (solid lines) and pH = 6.75 (broken lines), supporting electrolyte = 0.10 M NaClO<sub>4</sub>, and scan rate = 100 mV s<sup>-1</sup>.

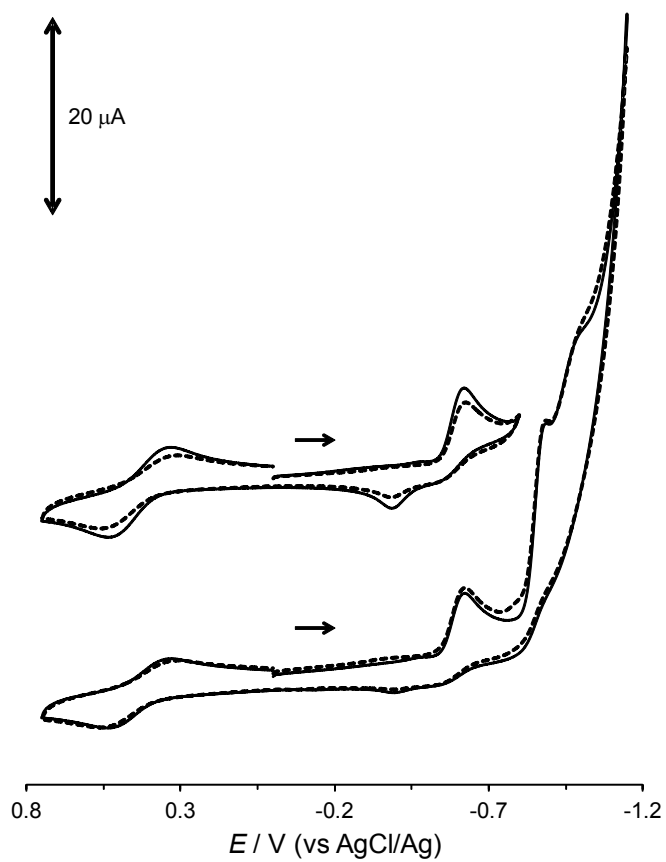

**Figure S21.** Cyclic voltammograms of complexes **1** and **2** in water on a glassy carbon working electrode versus AgCl/Ag. [complex **1**] = 0.64 mM (solid lines) and [complex **2**] = 0.63 mM (broken lines), pH = 2.30, supporting electrolyte = 0.10 M NaClO<sub>4</sub>, and scan rate = 100 mV s<sup>-1</sup>.

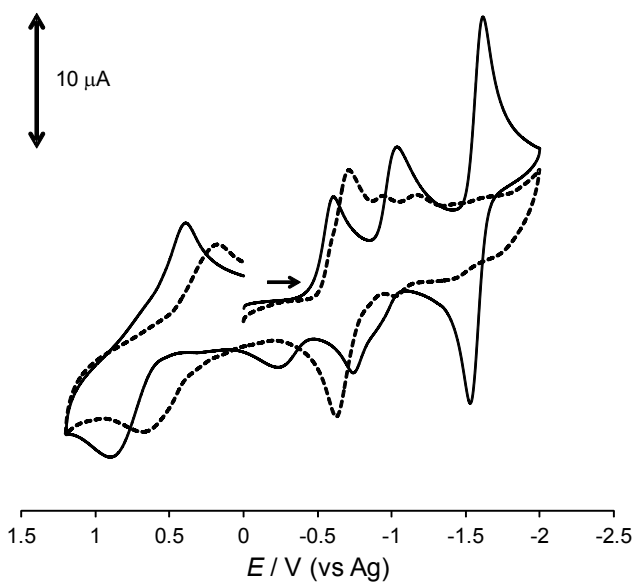

**Figure S22.** Cyclic voltammograms of complexes **1** and **2** in 2-butanone on a glassy carbon working electrode versus a Ag quasi-reference electrode. [complex **1**] = 1.02 mM (solid lines) and [complex **2**] = 1.08 mM (broken lines), supporting electrolyte = 0.10 M [<sup>n</sup>Bu<sub>4</sub>N]ClO<sub>4</sub>, and scan rate = 100 mV s<sup>-1</sup>.

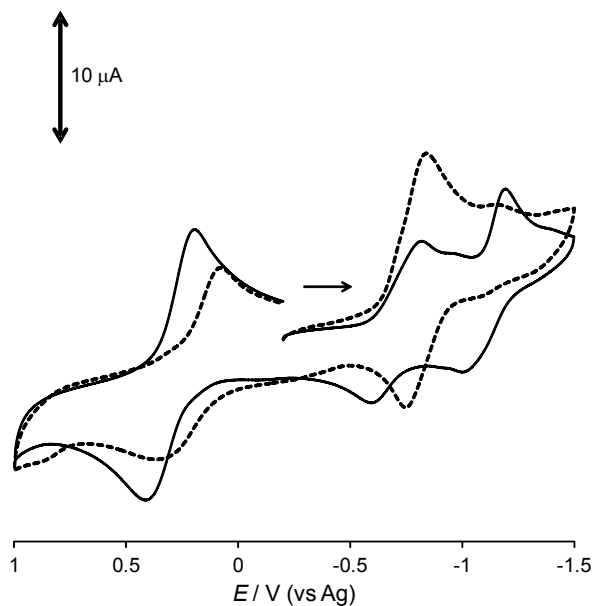

**Figure S23.** Cyclic voltammograms of complexes **1** and **2** in 1,2-difluorobenzene/acetone (4:1 v/v) on a glassy carbon working electrode versus a Ag quasi-reference electrode. [complex **1**] = 1.05 mM (solid lines) and [complex **2**] = 1.03 mM (broken lines), supporting electrolyte = 0.10 M [<sup>n</sup>Bu<sub>4</sub>N]ClO<sub>4</sub>, and scan rate = 100 mV s<sup>-1</sup>.

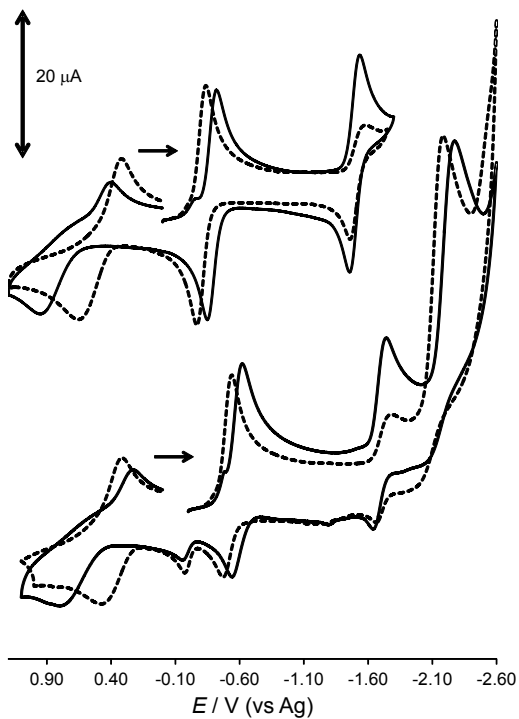

**Figure S24.** Cyclic voltammograms of complex **1** in  $\text{CH}_3\text{CN}$  on a glassy carbon working electrode versus a Ag quasi-reference electrode.  $[\text{complex } \mathbf{1}] = 1.04 \text{ mM}$  (solid lines) and  $[\text{complex } \mathbf{1}] = 1.04 \text{ mM}$  with  $5.09 \text{ mM}$  pyridine (broken lines), supporting electrolyte =  $0.10 \text{ M}$   $[\text{nBu}_4\text{N}]\text{ClO}_4$ , and scan rate =  $100 \text{ mV s}^{-1}$ .

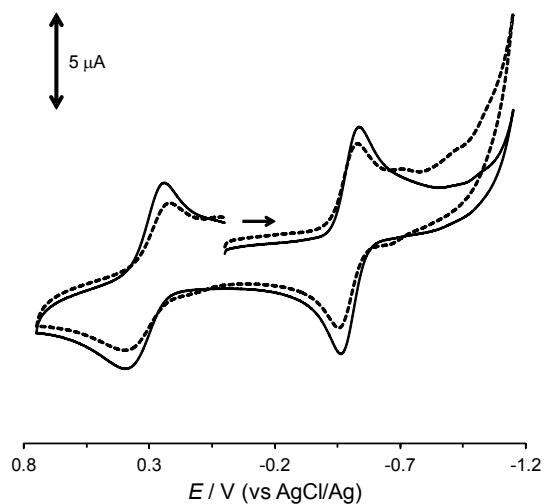

**Figure S25.** Cyclic voltammograms of complexes **1** and **2** in water with pyridine on a glassy carbon working electrode versus AgCl/Ag.  $[\text{complex } \mathbf{1}] = 0.64 \text{ mM}$  with  $5.21 \text{ mM}$  pyridine (solid lines) and  $[\text{complex } \mathbf{2}] = 0.63 \text{ mM}$  with  $5.21 \text{ mM}$  pyridine (broken lines), supporting electrolyte =  $0.10 \text{ M}$   $\text{NaClO}_4$ , and scan rate =  $100 \text{ mV s}^{-1}$ .



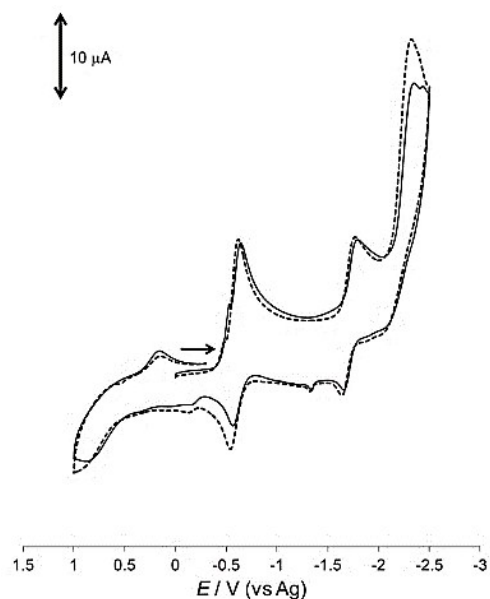

**Figure S26.** Cyclic voltammograms complex **1** in  $\text{CH}_3\text{CN}$  on a glassy carbon working electrode versus a Ag quasi-reference electrode.  $[\text{complex } \mathbf{1}] = 1.02 \text{ mM}$  (solid lines) and  $[\text{complex } \mathbf{1}] = 1.02 \text{ mM}$  with  $15.0 \text{ mM}$  2-methylpyridine (broken lines), supporting electrolyte =  $0.10 \text{ M}$   $[\text{nBu}_4\text{N}]\text{ClO}_4$ , and scan rate =  $100 \text{ mV s}^{-1}$ .

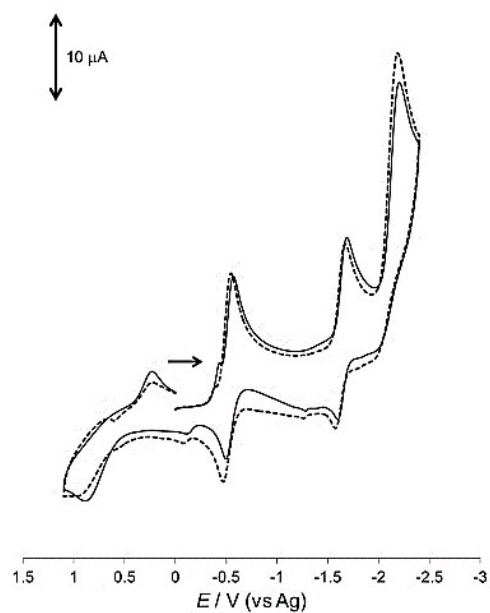

**Figure S27.** Cyclic voltammograms of complex **1** in  $\text{CH}_3\text{CN}$  on a glassy carbon working electrode versus a Ag quasi-reference electrode.  $[\text{complex } \mathbf{1}] = 1.02 \text{ mM}$  (solid lines) and  $[\text{complex } \mathbf{1}] = 1.02 \text{ mM}$  with  $15.1 \text{ mM}$  2,6-dimethylpyridine (broken lines), supporting electrolyte =  $0.10 \text{ M}$   $[\text{nBu}_4\text{N}]\text{ClO}_4$ , and scan rate =  $100 \text{ mV s}^{-1}$ .

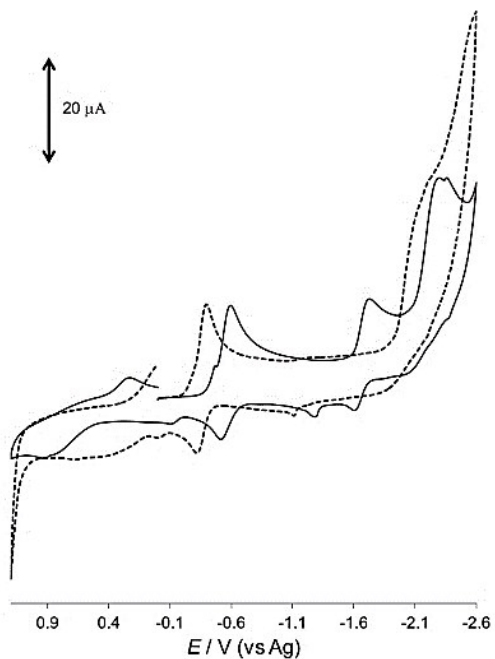

**Figure S28.** Cyclic voltammograms of complex **1** in acetonitrile on a glassy carbon working electrode versus a Ag quasi-reference electrode. [complex **1**] = 1.05 mM (solid lines) and [complex **1**] = 1.05 mM with [2-aminopyridine] = 5.10 mM (broken lines), supporting electrolyte = 0.10 M [<sup>n</sup>Bu<sub>4</sub>N]ClO<sub>4</sub>, and scan rate = 100 mV s<sup>-1</sup>.

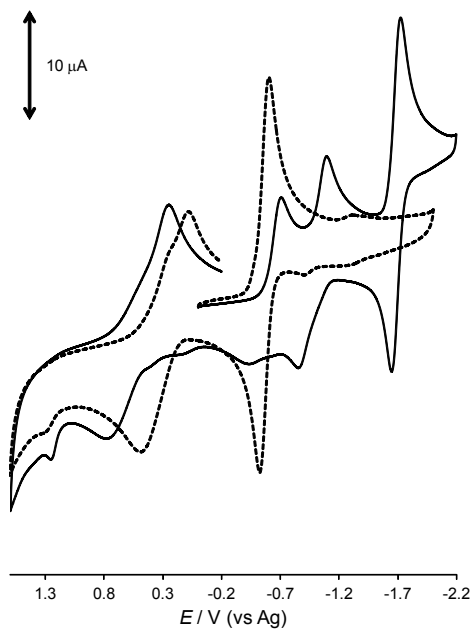

**Figure S29.** Cyclic voltammograms of complex **1** in acetone on a glassy carbon working electrode versus a Ag quasi-reference electrode. [complex **1**] = 1.04 mM (solid lines) and [complex **1**] = 1.04 mM with 5.09 mM of pyridine (broken lines), supporting electrolyte = 0.10 M [<sup>n</sup>Bu<sub>4</sub>N]ClO<sub>4</sub>, and scan rate = 100 mV s<sup>-1</sup>.

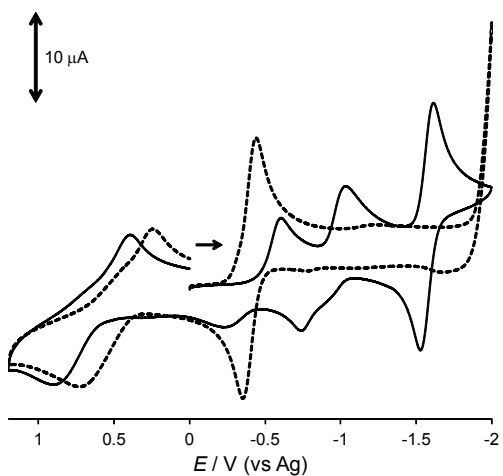

**Figure S30.** Cyclic voltammograms complex **1** in 2-butanone on a glassy carbon working electrode versus a Ag quasi-reference electrode. [complex **1**] = 1.02 mM (solid lines) and [complex **1**] = 1.02 mM with 5.09 mM of pyridine (broken lines), supporting electrolyte = 0.10 M [<sup>n</sup>Bu<sub>4</sub>N]ClO<sub>4</sub>, and scan rate = 100 mV s<sup>-1</sup>.

#### 1.4 Spectroelectrochemistry

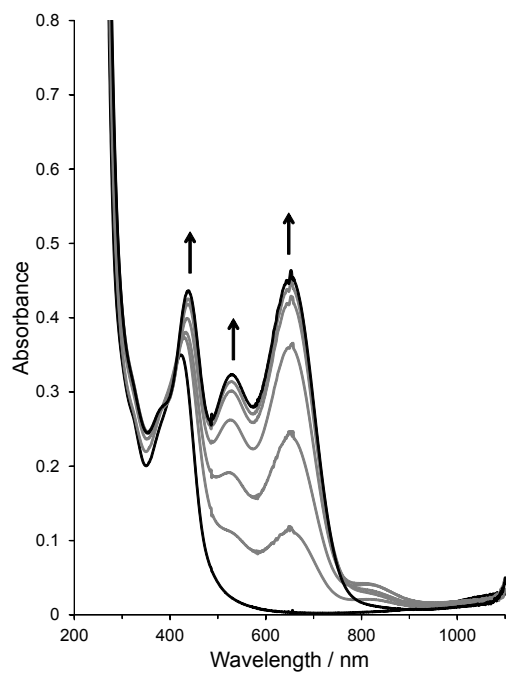

**Figure S31.** Absorbance changes in the UV-visible spectra of complex **1** with pyridine in acetonitrile at a constant potential of -1.0 V versus a Ag quasi-reference electrode. [complex **1**] = 1.05 mM, [pyridine] = 5.09 mM, supporting electrolyte = 0.10 M [<sup>n</sup>Bu<sub>4</sub>N]ClO<sub>4</sub>, and path length = 1 mm.

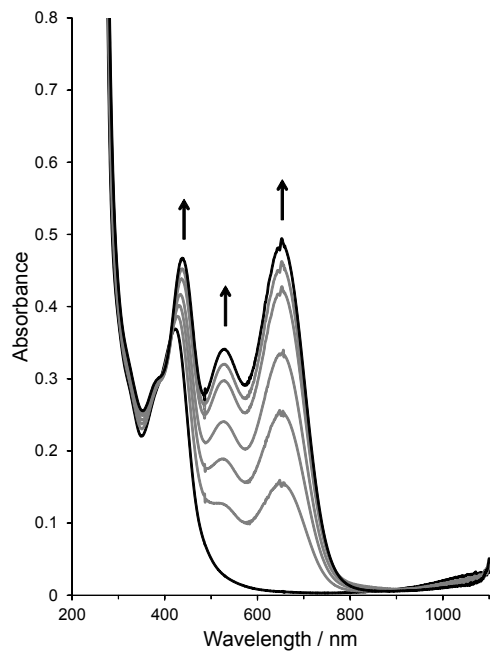

**Figure S32.** Absorbance changes in the UV-visible spectra of complex **1** with pyridine in acetonitrile at a constant potential of  $-1.0$  V versus a Ag quasi-reference electrode. [complex **1**] =  $1.05$  mM, [pyridine] =  $10.18$  mM, supporting electrolyte =  $0.10$  M  $[\text{nBu}_4\text{N}]\text{ClO}_4$ , and path length =  $1$  mm.

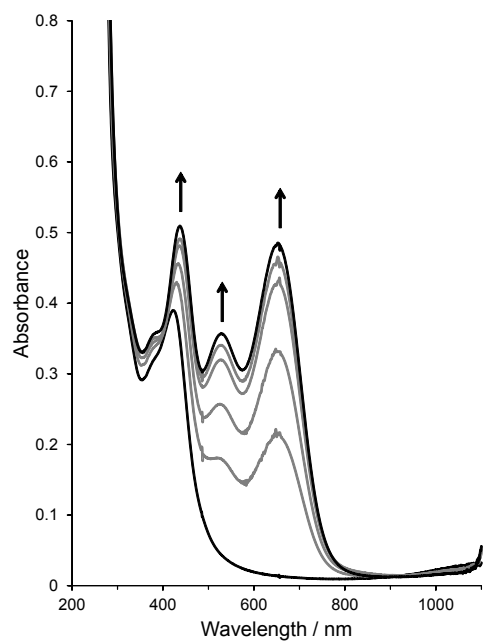

**Figure S33.** Absorbance changes in the UV-visible spectra of complex **2** with pyridine in acetonitrile at a constant potential of  $-1.0$  V versus a Ag quasi-reference electrode. [complex **2**] =  $1.02$  mM, [pyridine] =  $10.18$  mM, supporting electrolyte =  $0.10$  M  $[\text{nBu}_4\text{N}]\text{ClO}_4$ , and path length =  $1$  mm.

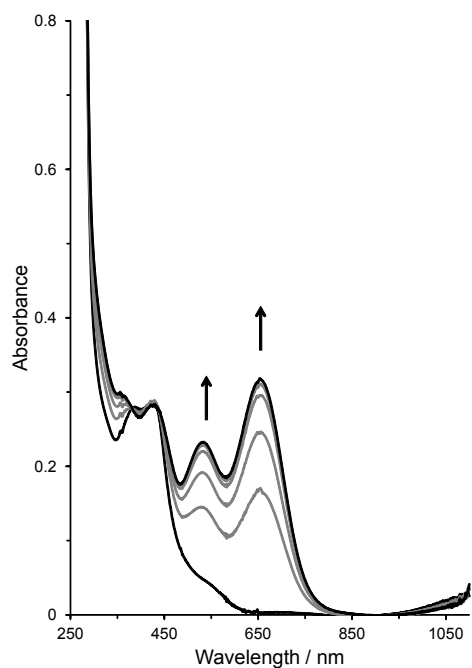

**Figure S34.** Absorbance changes in the UV-visible spectra of complex **1** with 2-aminopyridine in acetonitrile at a constant potential of  $-1.0$  V versus a Ag quasi-reference electrode. [complex **1**] =  $1.05$  mM, [2-aminopyridine] =  $5.10$  mM, supporting electrolyte =  $0.10$  M [ $n$ Bu $_4$ N]ClO $_4$ , and path length =  $1$  mm.

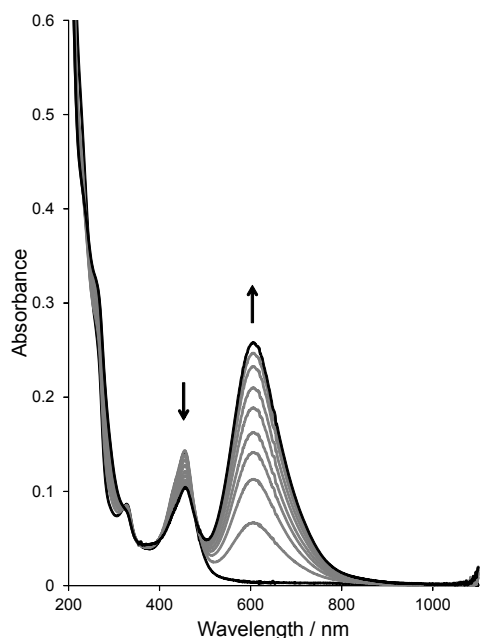

**Figure S35.** Absorbance changes in the UV-visible spectra of complex **1** in water at a constant potential of  $-0.75$  V versus AgCl/Ag. [complex **1**] =  $0.51$  mM, supporting electrolyte =  $0.10$  M NaClO $_4$ , pH =  $5.79$ , and path length =  $1$  mm. *Note: At low pH (e.g., 2.30) the evolution of hydrogen is observed. The use of a buffer was avoided to eliminate substitution of the axial water ligands in complex **1** via anation.*

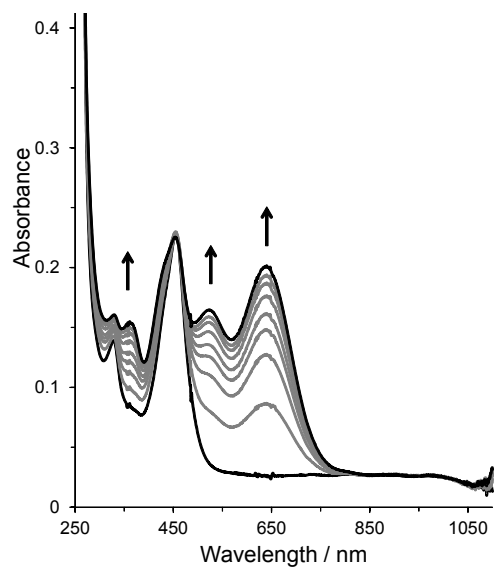

**Figure S36.** Absorbance changes in the UV-visible spectra of complex **1** in water at a constant potential of  $-0.70$  V versus a Ag quasi-reference electrode.  $[\text{complex } \mathbf{1}] = 0.60$  mM,  $[\text{pyridine}] = 5.21$  mM, supporting electrolyte =  $0.10$  M  $\text{NaClO}_4$ , pH = 4.58, and path length = 1 mm.

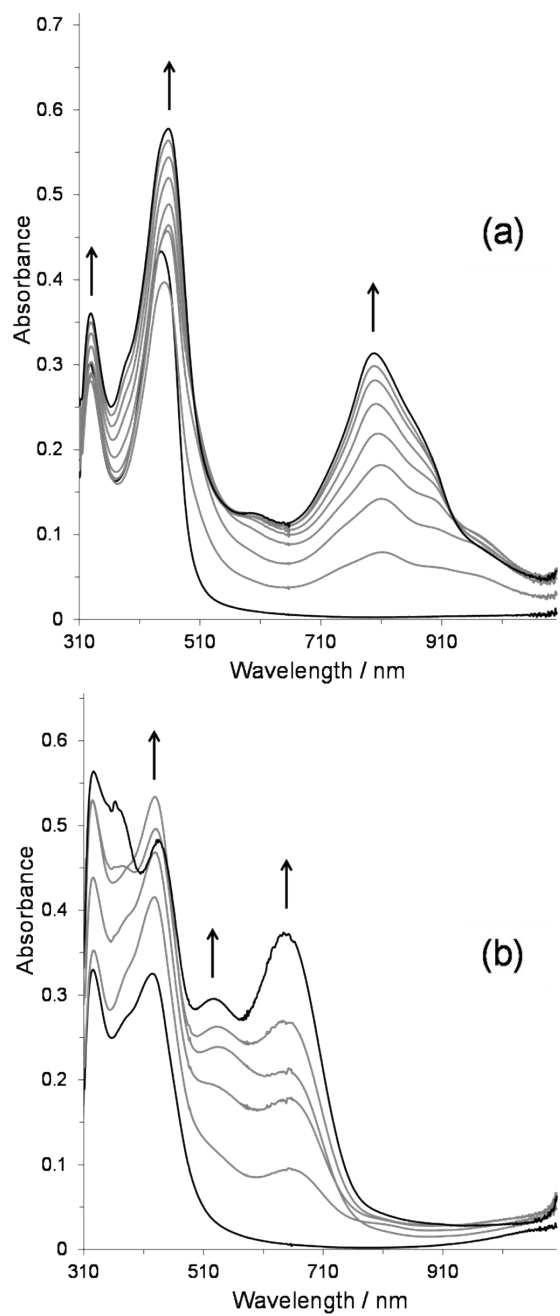

**Figure S37.** Absorbance changes in the UV-visible spectra of complexes **1** and **2** in acetone at a constant potential of  $-0.90$  V versus a Ag quasi-reference electrode; supporting electrolyte =  $0.10$  M  $[\text{nBu}_4\text{N}]\text{ClO}_4$ , and path length =  $1$  mm. (a)  $[\text{complex } \mathbf{1}] = 1.14$  mM, (b)  $[\text{complex } \mathbf{2}] = 1.08$  mM.

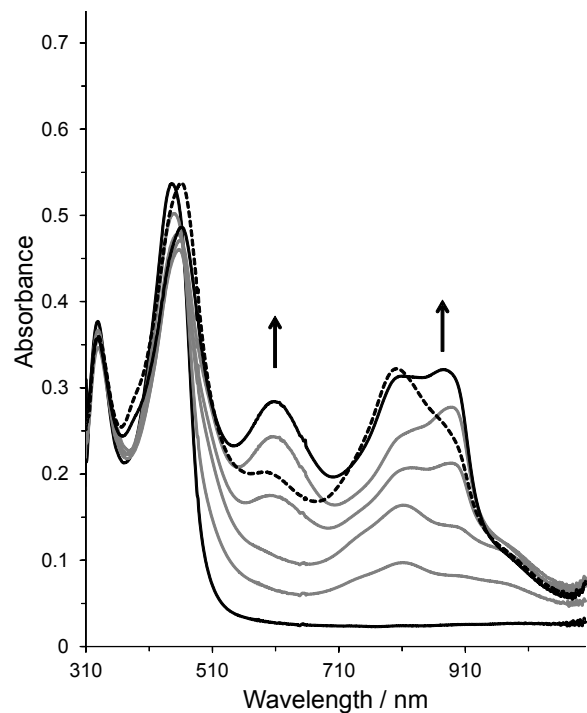

**Figure S38.** Absorbance changes in the UV-visible spectra of complex **1** in acetone at a constant potential of  $-1.30$  V versus a Ag quasi-reference electrode.  $[\text{complex } \mathbf{1}] = 1.14$  mM, supporting electrolyte =  $0.10$  M  $[\text{tBu}_4\text{N}]\text{ClO}_4$ , and path length =  $1$  mm. Broken line illustrates the spectrum after an extended time.

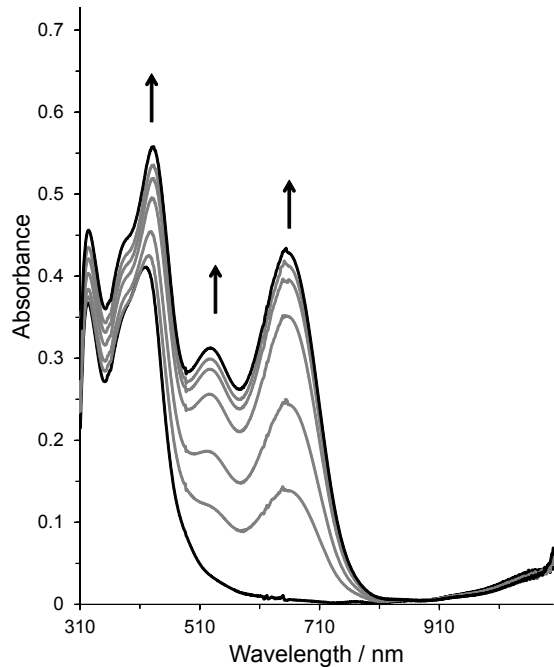

**Figure S39.** Absorbance changes in the UV-visible spectra of complex **1** with pyridine in acetone at a constant potential of  $-0.90$  V versus a Ag quasi-reference electrode.  $[\text{complex } \mathbf{1}] = 1.14$  mM,  $[\text{pyridine}] = 5.09$  mM, supporting electrolyte =  $0.10$  M  $[\text{tBu}_4\text{N}]\text{ClO}_4$ , and path length =  $1$  mm.



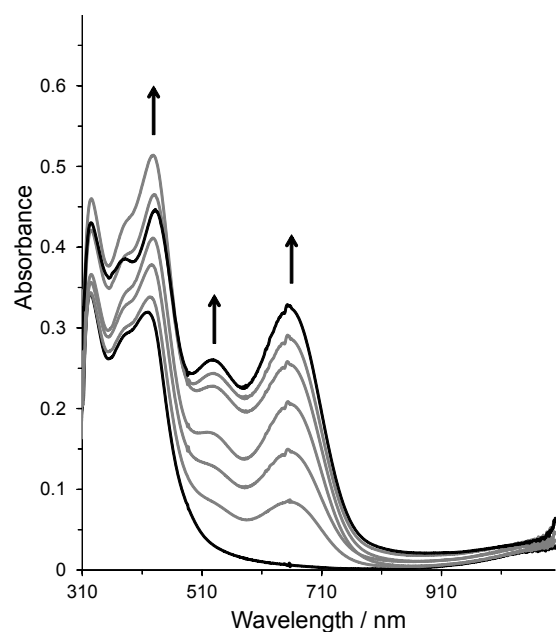

**Figure S40.** Absorbance changes in the UV-visible spectra of complex **2** with pyridine in acetone at a constant potential of  $-0.90$  V versus a Ag quasi-reference electrode.  $[\text{complex } \mathbf{2}] = 1.08$  mM,  $[\text{pyridine}] = 5.09$  mM, supporting electrolyte =  $0.10$  M  $[\text{nBu}_4\text{N}]\text{ClO}_4$ , and path length =  $1$  mm.

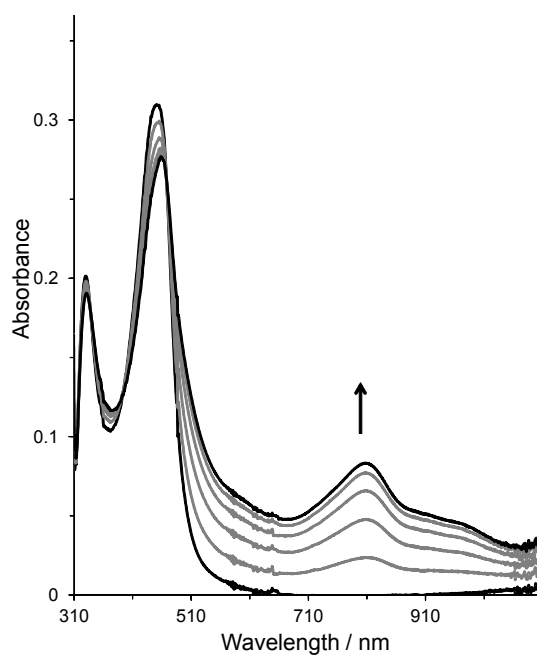

**Figure S41.** Absorbance changes in the UV-visible spectra of complex **1** in 2-butanone at a constant potential of  $-0.70$  V versus a Ag quasi-reference electrode.  $[\text{complex } \mathbf{1}] = 1.04$  mM, supporting electrolyte =  $0.10$  M  $[\text{nBu}_4\text{N}]\text{ClO}_4$ , and path length =  $1$  mm.

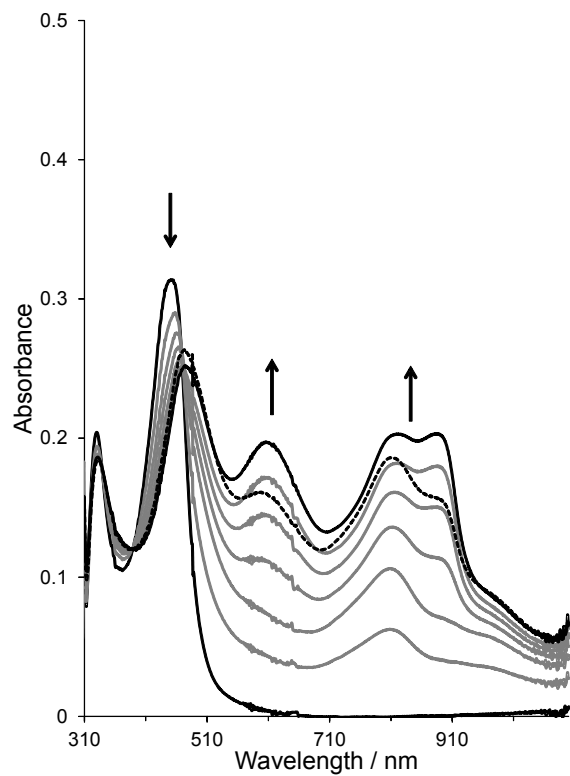

**Figure S42.** Absorbance changes in the UV-visible spectra of complex **1** in 2-butanone at a constant potential of  $-1.10$  V versus a Ag quasi-reference electrode.  $[\text{complex } \mathbf{1}] = 1.04$  mM, supporting electrolyte =  $0.10$  M  $[\text{nBu}_4\text{N}]\text{ClO}_4$ , and path length =  $1$  mm. Broken line illustrates the spectrum after an extended time.

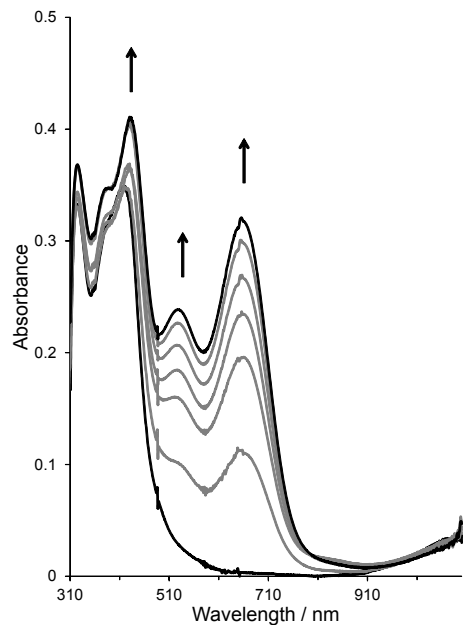

**Figure S43.** Absorbance changes in the UV-visible spectra of complex **1** with pyridine in 2-butanone at a constant potential of  $-0.70$  V versus a Ag quasi-reference electrode.  $[\text{complex } \mathbf{1}] = 1.04$  mM,  $[\text{pyridine}] = 5.09$  mM, supporting electrolyte =  $0.10$  M  $[\text{nBu}_4\text{N}]\text{ClO}_4$ , and path length =  $1$  mm.

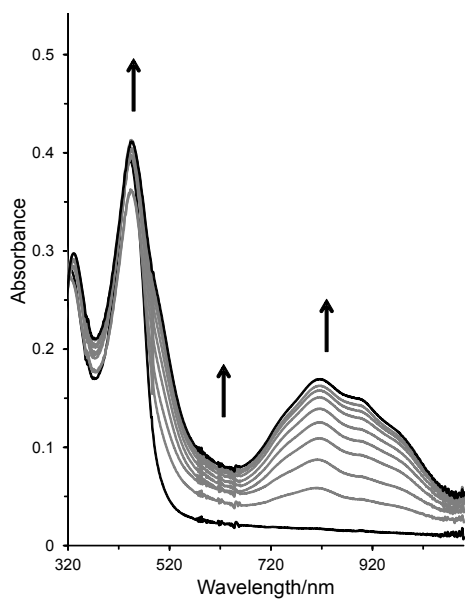

**Figure S44.** Absorbance changes in the UV-visible spectra of complex **1** in 1,2-difluorobenzene/acetone (4:1, v/v) at a constant potential of  $-0.90$  V versus a Ag quasi-reference electrode.  $[\text{complex } \mathbf{1}] = 1.05$  mM, supporting electrolyte =  $0.10$  M  $[\text{nBu}_4\text{N}]\text{ClO}_4$ , and path length =  $1$  mm.

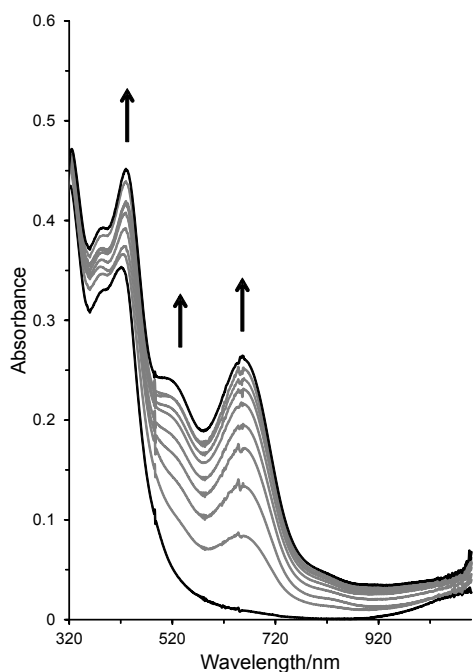

**Figure S45.** Absorbance changes in the UV-visible spectra of complex **2** in 1,2-difluorobenzene/acetone (4:1, v/v) at a constant potential of  $-0.90$  V versus a **Ag quasi-reference electrode**. [complex **2**] = 1.03 mM, supporting electrolyte = 0.10 M  $[\text{nBu}_4\text{N}]\text{ClO}_4$ , and path length = 1 mm.

### 1.5 $^{11}\text{B}$ , $^{19}\text{F}$ , and $^{59}\text{Co}$ NMR spectroscopic studies

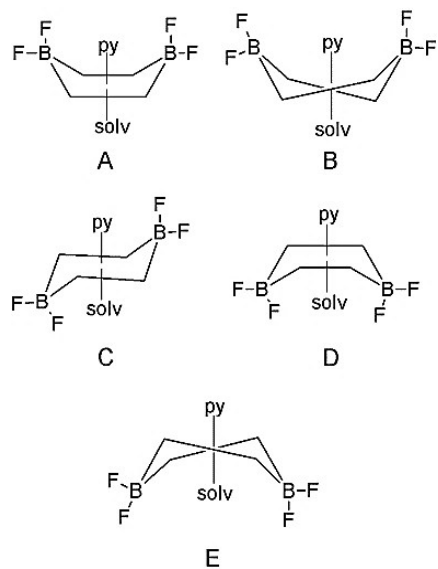

**Figure S46.** Conformers most likely adopted by the  $\text{BF}_2$  caps of complex **2**.

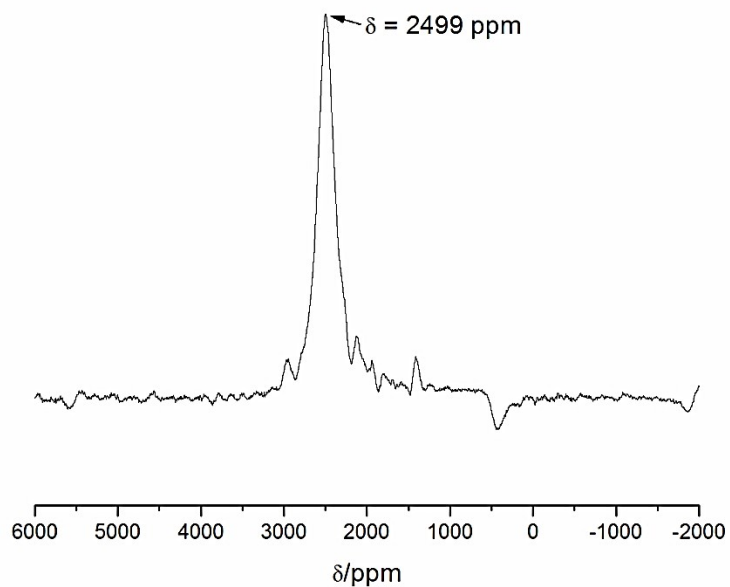

**Figure S47.**  $^{59}\text{Co}$  NMR spectrum of the Co(I) species produced from 50 mM of complex **1**, 500 mM of  $[\text{nBu}_4\text{N}]\text{BH}_4$ , and 250 mM of 2,3,5,6-tetrafluoropyridine ( $\text{pyF}_4$ ) in  $\text{CD}_3\text{CN}$ .

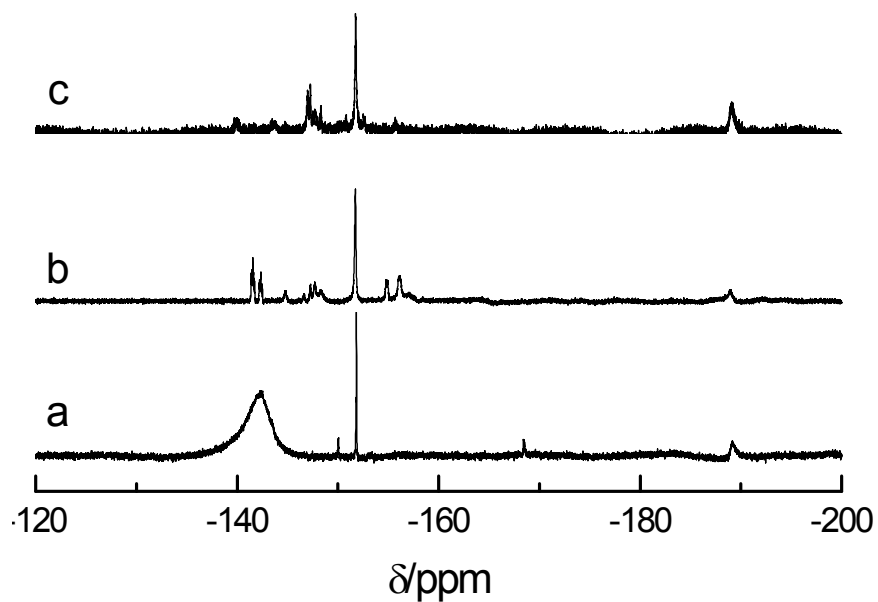

**Figure S48.**  $^{19}\text{F}$  NMR spectra in  $\text{CD}_3\text{CN}$  of (a) 50 mM complex **1**, (b) 50 mM complex **2**, (c) 50 mM complex **1** with 250 mM pyridine.

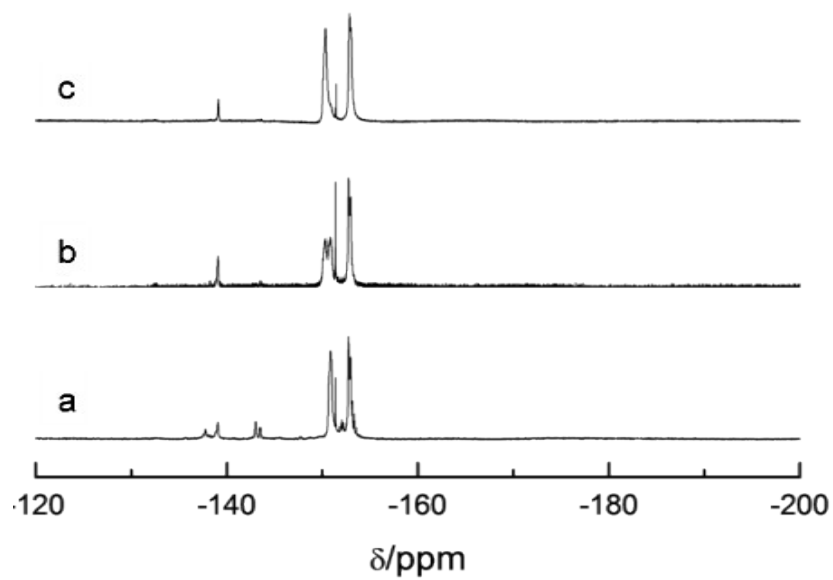

**Figure S49.**  $^{19}\text{F}$  NMR spectra acquired in  $\text{CD}_3\text{CN}$  of (a) 50 mM complex **1** with 500 mM  $[\text{Bu}_4\text{N}]\text{BH}_4$ ; (b) 50 mM complex **2** with 500 mM  $[\text{Bu}_4\text{N}]\text{BH}_4$ , and (c) 50 mM complex **1** with 250 mM pyridine and 500 mM  $[\text{Bu}_4\text{N}]\text{BH}_4$ .

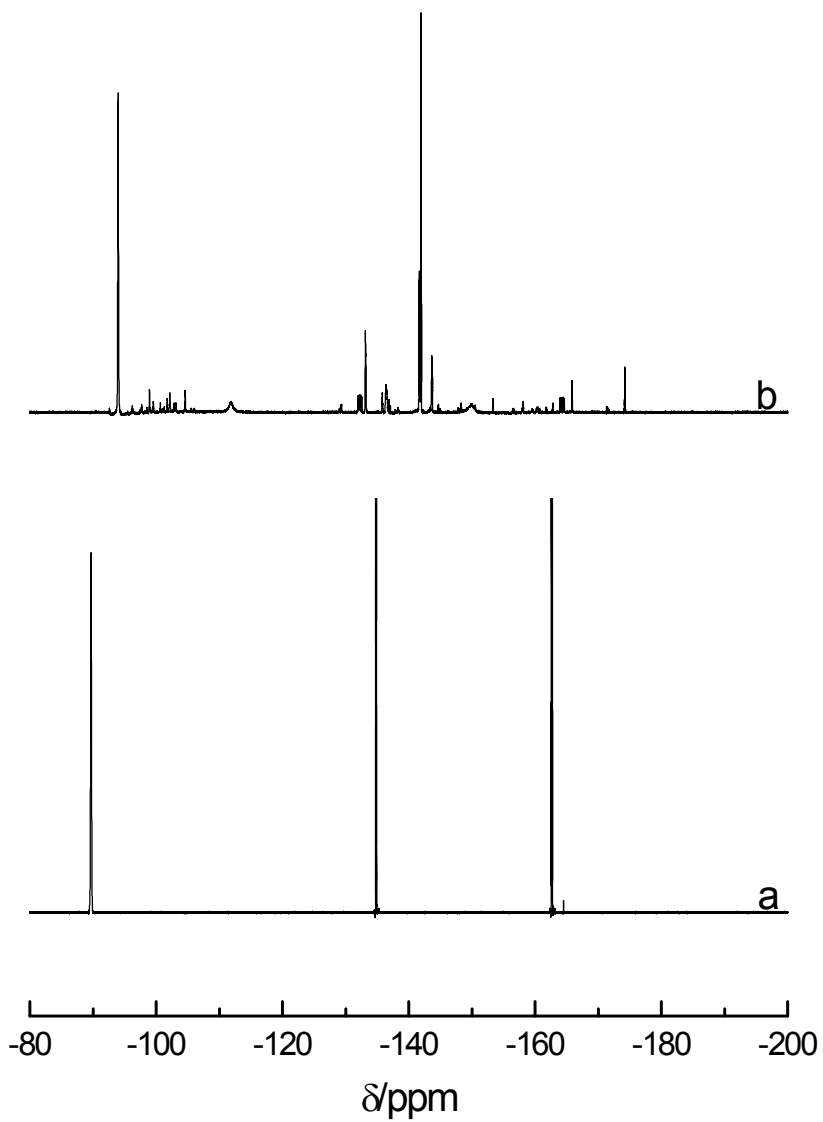

**Figure S50.**  $^{19}\text{F}$  NMR spectra in  $\text{CD}_3\text{CN}$  of (a) 250 mM pentafluoropyridine ( $\text{pyF}_5$ ) and (b) 250 mM  $\text{pyF}_5$  with 500 mM  $[\text{nBuN}]\text{BH}_4$ .

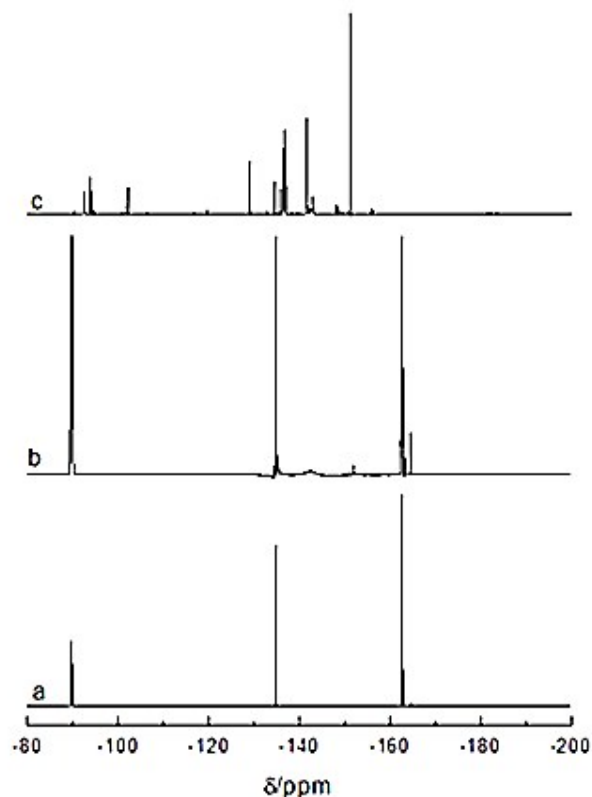

**Figure S51.**  $^{19}\text{F}$  NMR spectra in  $\text{CD}_3\text{CN}$  for (a) 250 mM  $\text{pyF}_5$ , (b) 50 mM complex **1** and 250 mM  $\text{pyF}_5$  and (c) 50 mM complex **1**, 250 mM  $\text{pyF}_5$  and 500 mM  $[\text{nBu}_4\text{N}]\text{BH}_4$ .

**Table S7.**  $^{19}\text{F}$  and  $^{11}\text{B}$  NMR chemical shifts for mixtures of  $[\text{Co}(\text{dmgBF}_2)_2(\text{H}_2\text{O})_2]$  (complex **1**), fluorinated pyridines, and tetrabutylammonium tetrafluoroborate in  $\text{CD}_3\text{CN}$ .

| Entry | Species/mixture                                                         | $\delta_{\text{B}} / \text{ppm}$                             | $\delta_{\text{F}} / \text{ppm}$                                                                                                                                                                                                                                                                                                                                   |
|-------|-------------------------------------------------------------------------|--------------------------------------------------------------|--------------------------------------------------------------------------------------------------------------------------------------------------------------------------------------------------------------------------------------------------------------------------------------------------------------------------------------------------------------------|
| 1     | Complex <b>1</b> + $[\text{nBu}_4\text{N}]\text{BH}_4$ + $\text{pyF}_5$ | 19.63, 6.11 (t), 3.42, 3.26, 2.06, 1.51, 1.40, 0.95-0.45 (m) | -45.7, -48.4, -49.1, -69.3, -75.1, -89.6, -91.8, -93.2, -95.3, -96.3, -97.5, -98.8, -99.5, -99.9, -100.3, -101.3, -102.0, -103.8, -104.7, -105.4, -105.5, -108.7, -115.8, -118.9, -119.1, -119.9, -122.3, -128.2, -128.5, -130.6, -132.1, -136.0, -137.1, -138.7, -140.9, -141.1, -142.7, -147.4, -147.5, -147.5, -147.65, -147.7, -147.8, -150.6, -164.8, -173.5, |
| 2     | Complex <b>1</b> + $[\text{nBu}_4\text{N}]\text{BH}_4$ + $\text{pyF}_4$ | 19.92, 6.09, 3.44, 1.40, 0.79, -1.15, -10.60, -18.99, -19.69 | -48.8, -75.1, -89.6, -91.8, -93.2, -95.4, -95.8, -128.2, -128.5, -131.8, -135.0, -135.9, -136.1, -137.2, -138.2, -140.9, -141.1, -142.8, -147.4, -147.5, -147.5, -150.1, -150.6, -150.6, -152.0, -152.2                                                                                                                                                            |



## 1.6 Electrocatalytic behavior

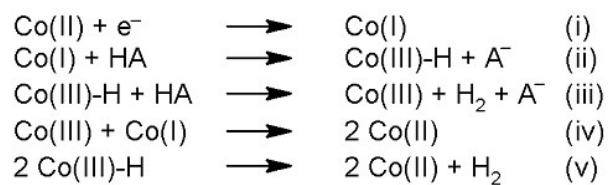

**Scheme S1.** Proposed mechanism for the electrocatalytic reduction of protons (from an acid source, HA) by cobaloximes.<sup>1</sup>

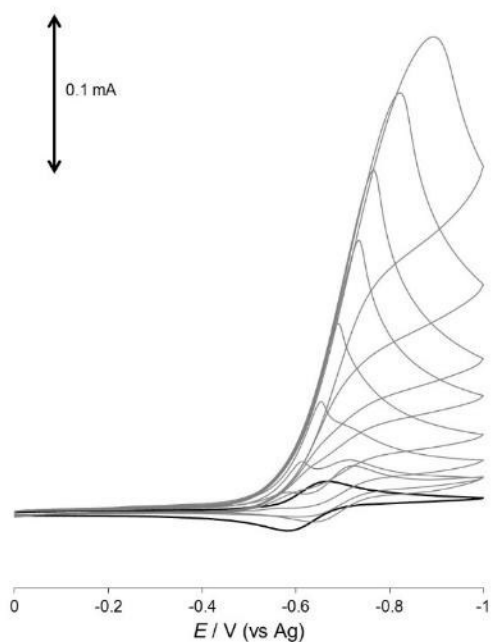

**Figure S52.** Cyclic voltammograms involving electrocatalysis with complex **2** in CH<sub>3</sub>CN. [complex **2**] = 1.08 mM in the absence (black) and presence of aliquots of *p*-cyanoanilinium tetrafluoroborate (3.21, 5.54, 9.52, 13.8, 19.6, 25.3, 34.5, and 44.7 mM), supporting electrolyte = 0.10 M [<sup>n</sup>Bu<sub>4</sub>N]ClO<sub>4</sub>, and scan rate = 100 mV s<sup>-1</sup> at a glassy carbon working electrode versus a Ag quasi-reference electrode.

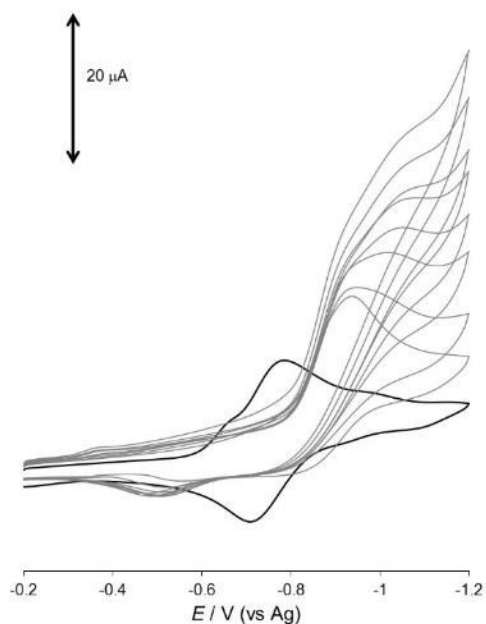

**Figure S53.** Cyclic voltammograms involving electrocatalysis with complex **1** in acetone. [complex **1**] = 1.08 mM in the absence (black) and presence of aliquots of  $p$ -cyanoanilinium tetrafluoroborate (1.80, 3.16, 4.52, 6.17, 8.74, 11.2, 14.9, and 18.6 mM), supporting electrolyte = 0.10 M  $[nBu_4N]ClO_4$ , and scan rate =  $100 \text{ mV s}^{-1}$  at a glassy carbon working electrode versus a Ag quasi-reference electrode.

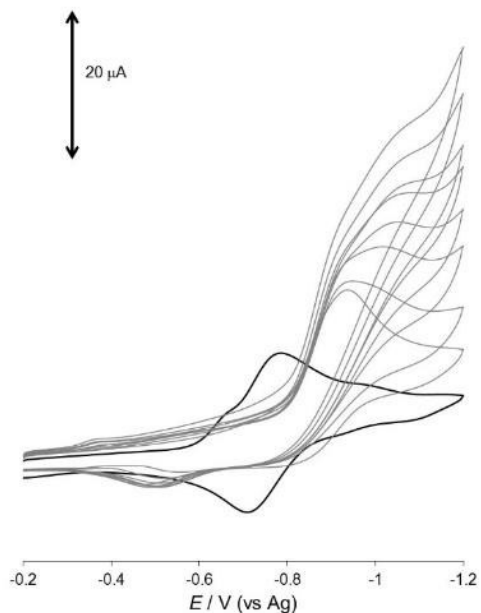

**Figure S54.** Cyclic voltammograms involving electrocatalysis with complex **2** in acetone. [complex **2**] = 1.08 mM in the absence (black) and presence of aliquots of  $p$ -cyanoanilinium tetrafluoroborate (1.70, 3.54, 5.24, 7.28, 9.42, 12.4, 16.1, and 18.7 mM), supporting electrolyte = 0.10 M  $[nBu_4N]ClO_4$ , and scan rate =  $100 \text{ mV s}^{-1}$  at a glassy carbon working electrode versus a Ag quasi-reference electrode.

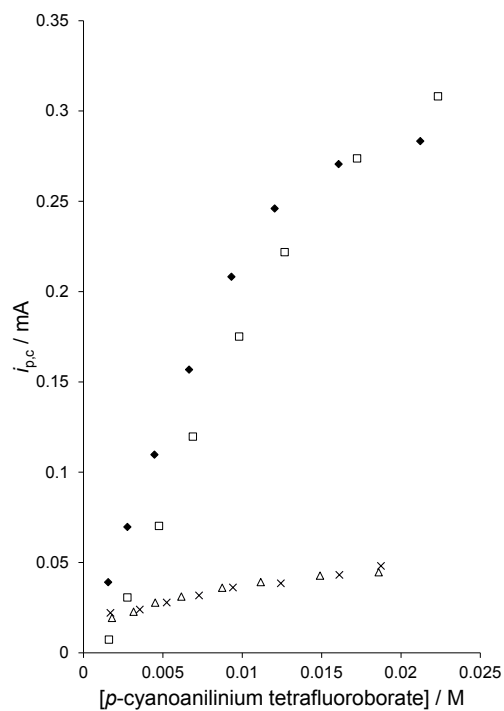

**Figure S55.** Dependence of the catalytic peak current ( $i_{pc,1}$ ) on the concentration of *p*-cyanoanilinium tetrafluoroborate at a scan rate of 100 mV s<sup>-1</sup> for complex **1** (♦: in CH<sub>3</sub>CN, Δ: in acetone) and complex **2** (□: in CH<sub>3</sub>CN, ×: acetone) in 0.10 M [nBu<sub>4</sub>N]ClO<sub>4</sub>, at a glassy carbon working electrode versus a Ag quasi-reference electrode.

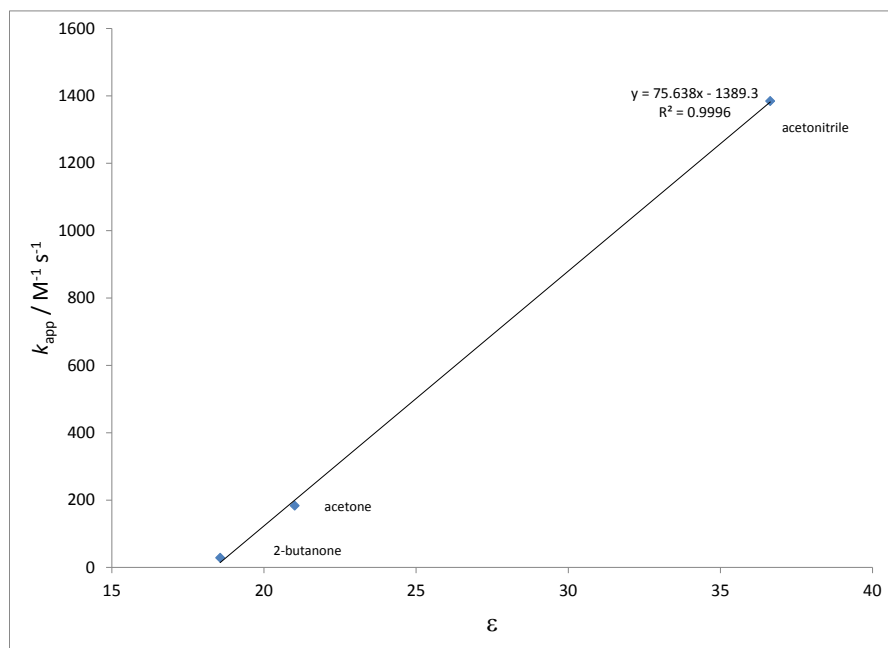

**Figure S56.** The effect of dielectric constant on  $k_{app}$  (from Table 6 of main text) for complex **1**.

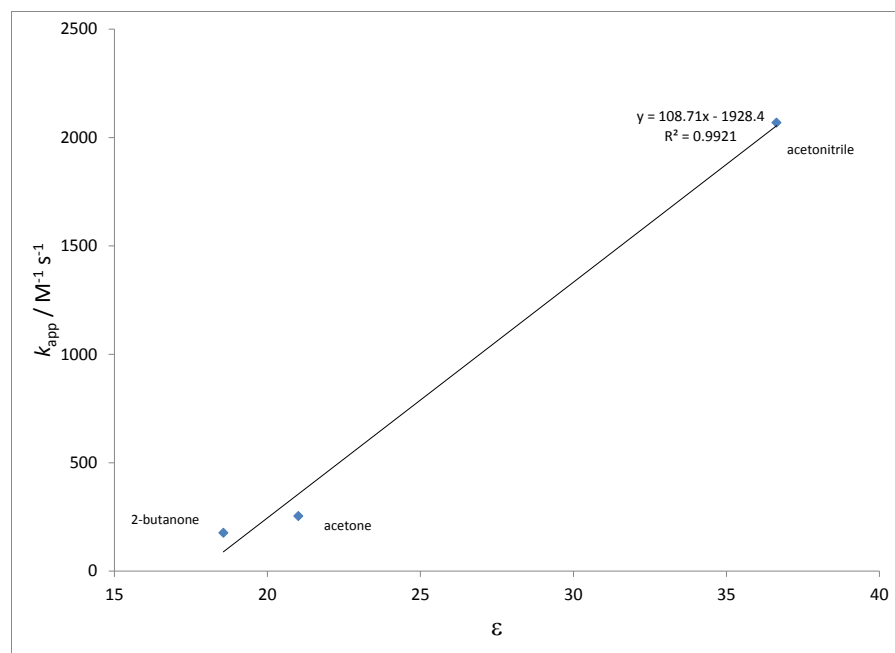

**Figure S57.** The effect of dielectric constant on  $k_{app}$  (from Table 6 of main text) for complex **2**.

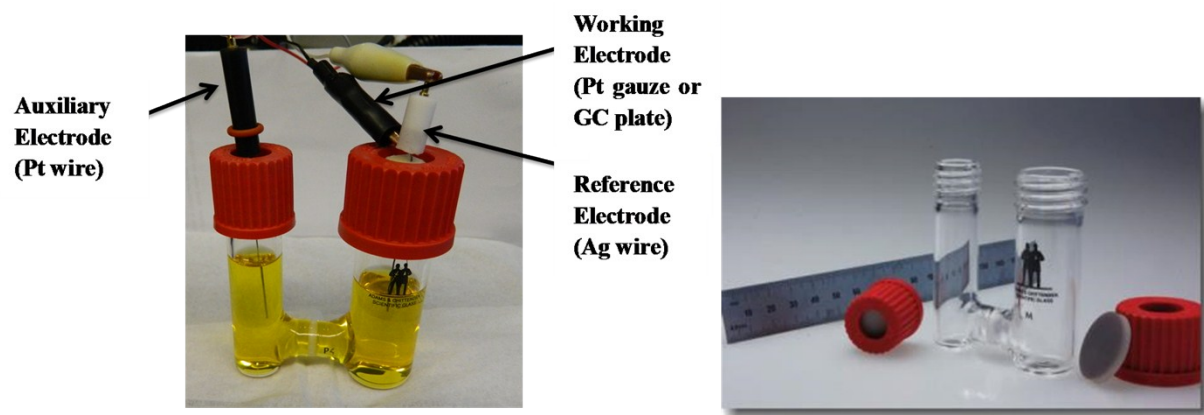

**Figure S58.** Setup of the H-Cell used for the electrocatalytic generation of hydrogen.

#### Reference

1. X. Hu, B. S. Brunshwig and J. C. Peters, *J. Am. Chem. Soc.*, 2007, **129**, 8988-8998.
